# Supplementary material for: Dynamics and magnetic properties of NO molecules encapsulated in open-cage fullerene derivatives evidenced by low temperature heat capacity
Source: Royal Society of Chemistry journal article supplement (doi:10.1039/d1cp00482d), 2021-01-01
Supplement: d1cp00482d1.pdf [file d1cp00482d1.pdf]

**Dynamics and magnetic properties of an NO molecule encapsulated in an open-cage fullerene derivative evidenced by low temperature heat capacity**

Yoji Horii,<sup>\*a</sup> Hal Suzuki,<sup>\*b</sup> Yuji Miyazaki,<sup>\*c</sup> Motohiro Nakano,<sup>c</sup> Shota Hasegawa,<sup>d</sup> Yoshifumi Hashikawa<sup>d</sup> and Yasujiro Murata<sup>d</sup>

<sup>a</sup>*Department of Chemistry, Faculty of Science, Nara Women's University, Nara 630-8506, Japan.*

<sup>b</sup>*Department of Chemistry, Kindai University, 3-4-1 Kowakae, Higashiosaka, Osaka 577-8502, Japan.*

<sup>c</sup>*Research Center for Thermal and Entropic Science, Graduate School of Science, Osaka University, 1-1 Machikaneyama-cho, Toyonaka, Osaka 560-0043, Japan.*

<sup>d</sup>*Institute for Chemical Research, Kyoto University, Uji, Kyoto 611-0011, Japan.*

## Experimental

### 1. Sample preparation

**1**, (NO)**@1**, **2** and (NO)**@2** were synthesized according to the literature methods.<sup>1-3</sup>

#### Preparation of **1**

Compound **1** was dissolved in a 1:1 mixed solvent system consisting of chloroform and hexane. The microcrystals were obtained by slow evaporation at 5 °C over few days. After filtration, the crystalline sample was washed with chloroform/hexane (1:1) and dried under vacuum at 120 °C for 24 hours. CHN elemental analyses found: C 82.66 %, H 3.16 %, N 3.03 %, calculated for  $C_{82}H_{28}N_2O_4S(H_2O)_{2.6}(N_2)_{0.29}$ : C 82.61 %, H 2.81 %, N 3.03 %

#### Preparation of (NO)**@1**

(NO)**@1** was crystallized in the similar manner with that of **1**. The sample was dried under vacuum at room temperature for 15 min.

CHN elemental analyses found: C 80.29%, H 3.54%, N 3.00%, calculated for  $C_{82}H_{28}N_2O_4S(NO)_{0.63}(N_2)_{0.06}(H_2O)_{3.95}(C_6H_{14})_{0.66}$ : C 80.30%, H 3.54%, N 2.99%

#### Preparation of **2**

Compound **2** was dissolved in chloroform. The microcrystals were obtained by slow evaporation at 5 °C over a day. After filtration, the crystalline sample was washed with chloroform and dried under vacuum for an hour. CHN elemental analyses found: C 80.77%, H 3.81%, N 2.31%, calculated for  $C_{82}H_{32}N_2O_4S(H_2O)_{4.33}$ : C 80.78%, H 3.36%, N 2.29%

#### Preparation of (NO)**@2**

(NO)**@2** was crystallized in the similar manner with that of **2**. The sample was dried under vacuum at room temperature for 2 hours.

CHN elemental analyses found: C 77.01%, H 3.18%, N 3.16%, calculated for  $C_{82}H_{32}N_2O_4S(NO)_{0.80}(N_2)_{0.06}(H_2O)_{0.91}(CHCl_3)_{0.99}$ : C 77.01%, H 2.72%, N 3.16%

## 2. Heat capacity measurements

Heat capacities were acquired by relaxation calorimeter using Quantum Design Physical Property Measurement System (PPMS) with heat capacity measurement option.  $^3\text{He}$  option was used between 0.35 and 10 K and  $^4\text{He}$  option was used above 10 K. Sample masses were measured by using ultra microbalance Sartorius MSA2.7S0TRDM. The samples were pressed into pellet and attached to a sample platform using Apiezon N grease. Buoyancies of the samples were corrected using the sample densities (Table S1).

**Table S1.** Buoyancy corrected sample masses used for heat capacity measurements.

|          | $^3\text{He}$ | $^4\text{He}$ |
|----------|---------------|---------------|
| <b>1</b> | 0.6417 mg     | 0.7848 mg     |
| <b>2</b> | 0.6888 mg     | 0.9423 mg     |
| (NO)@1   | 0.5528 mg     | 0.8058 mg     |
| (NO)@2   | 0.5035 mg     | 1.4029 mg     |

The lattice heat capacities for (NO)@1 and (NO)@2 were estimated by a fit for  $C_p$  in the temperature range from 2 to 5 K using following equation:

$$C_p = ET^{-2} + C_3T^3 + C_5T^5 + C_7T^7 + C_9T^9 \quad \text{Eq. S1}$$

where the first term is the high temperature side of the Schottky contribution, and the letter term is the lattice contribution. The optimized parameters for (NO)@1 and (NO)@2 are shown in Table S2. Removal of the  $ET^{-2}$  from the Eq. S1 affords the lattice heat capacities.

**Table S2.** Fitting parameters for Eq. S1.

|        | $E$     | $C_3$   | $C_5$      | $C_7$       | $C_9$      |
|--------|---------|---------|------------|-------------|------------|
| (NO)@1 | 0.5738  | 0.0517  | 3.55867E-4 | -3.28178E-5 | 4.71265E-7 |
| (NO)@2 | 0.53727 | 0.03555 | 0.00143    | -8.20906E-5 | 1.39563E-6 |

**Table S3.** Fitting parameters for low temperature side of the  $\Delta C_p$  (blue curve in Fig. 2b) using  $C_{\text{sch,low}} = A(B/T)^2 e^{-B/T}$ .

|        | $A$     | $B$     |
|--------|---------|---------|
| (NO)@1 | 0.31209 | 4.63632 |
| (NO)@2 | 0.26765 | 4.44698 |

### 3. Theoretical calculations

The calculations were conducted with the ORCA 4.2.<sup>4</sup> The molecular coordinates were obtained from their crystal structures with slight modification, where the tert-butyl groups were replaced by the hydrogens. All the geometry optimizations and the frequency calculations were conducted at the UB3LYP-D3BJ<sup>5-8</sup>/Def2-SVP<sup>9</sup> with RIJCOSX approximation using Def2/J<sup>10</sup> auxiliary basis set for speeding up the calculations.

For calculating *g*-factors, the molecular coordinates were reoriented as the NO axis being parallel to *z*-axis. Def2-TZVP<sup>9</sup> and Def2-SVP<sup>9</sup> basis sets were applied for NO units and cage molecules, respectively. Example of the input files used for calculations were summarized in the next pages. The initial orbitals for the complete-active space self-consistent field (CASSCF) calculations were obtained from the quasi-restricted orbitals (QRO) at UBP86<sup>11</sup> level with RI approximation (input #1), followed by the SCF iteration without changing QRO using "NOITER" command (input #2). Because the orbital hybridization among the  $2\pi^*$ -orbitals of the NO units and the orbitals of the cage molecules are weak, it is easy to recognize  $2\pi^*$ -orbitals from the molecular orbitals. Therefore, we selected the two  $2\pi^*$ -orbitals of the NO as the active orbitals. (1,2)-CASSCF calculations with the RI approximation using Def2-TZVP/c<sup>12</sup> for the NO units and Def2-SVP/c for the cages, and N-electron valence perturbation theory (NEVPT2) were applied to consider static and dynamic electron correlation. Spin-orbit coupling (SOC) calculations based on quasi-degenerated perturbation theory (QDPT) afforded SOC energies and *g*-factors (input #3).

### #1. Calculation of unrestricted natural orbitals

! uks bp86 def2-svp def2/j ri uno pal16

%scf maxiter 999 end

\*xyz 0 2

```
O 0.00000 -0.00000 0.00000 newgto "def2-tzvp" end
N -0.00000 0.00000 1.15045 newgto "def2-tzvp" end
C -3.29075 -0.48076 4.73507
C -2.99548 0.81528 4.83282
C -2.71248 1.72417 3.66344
C -1.22549 2.12548 3.54527
C -0.19145 1.60917 4.32941
C -0.05265 0.62155 5.46795
C 1.37780 -0.04380 5.30973
C 2.00883 0.64008 4.15467
C 2.90662 0.20080 3.18840
C 2.82058 -1.94074 1.73389
C 1.79941 -2.88024 1.66393
C 0.69732 -3.20277 2.70957
C -0.55950 -3.25674 1.78367
C -1.82211 -2.69417 1.98137
C -2.29936 -2.31245 3.33739
C -3.41253 -1.22375 3.43206
S 3.51589 -1.46388 3.30293
N -4.76484 -3.21641 2.96536
O -0.76764 0.36661 6.40036
O -1.83809 -2.79373 4.35543
N -3.00101 3.95130 4.61301
C -3.30158 -0.30317 2.23730
C -2.81031 1.83026 1.14443
O 1.80017 -0.89509 6.04561
C -3.28674 -0.95770 0.94975
O -0.89849 2.90022 2.34273
O 0.64660 -2.21756 3.68512
C -1.28001 3.31084 -0.09004
C -3.70591 5.05381 4.87513
C 0.11944 3.66033 -0.27192
C -3.56062 2.99249 3.87282
C -1.77810 2.86442 1.16231
C -3.20971 1.27392 -0.07945
C -3.03998 1.04766 2.33766
O 0.97019 3.59658 0.81558
C -2.67593 1.72307 -1.34289
C 1.48736 2.60028 2.83085
C -1.72046 2.72881 -1.34767
C -3.44058 -0.15303 -0.18116
C -2.57946 -2.23233 0.82241
C 0.44369 3.27590 2.11685
C -5.95422 -1.25620 3.67420
C -4.77300 -1.94294 3.36192
C 2.65539 2.38912 -0.51374
C -2.17848 -2.62936 -0.46911
C -3.02967 -0.57803 -1.50265
C -7.16673 -1.93501 3.56223
C 1.16291 1.75191 3.85396
C -0.58300 2.63216 -2.25582
C -5.00962 5.25530 4.41295
C 3.23874 1.05432 -0.52700
C -0.43682 1.51302 -0.08364
C 2.53716 2.24361 1.91180
C -7.15866 -3.27034 3.14786
C -4.86637 3.09186 3.37362
C 3.09638 0.94405 1.94976
C -5.92801 -3.86546 2.86267
C -2.55283 0.57908 -2.23221
C 2.85445 0.46451 -1.79801
C 2.82594 -1.71294 -0.70598
C 2.27014 2.94919 0.68928
C -0.91445 -3.29537 -0.65704
C 0.56723 3.18521 -1.56959
C 0.86426 0.87198 -3.21427
C 3.38327 0.28439 0.66043
C -5.59951 4.24669 3.64742
C -0.10888 -3.51752 0.45580
C 3.18996 -1.17451 0.54762
C 1.96065 1.37408 -2.50380
C 1.81962 2.56171 -1.68916
C 1.31219 -3.27126 0.38080
C -1.44975 0.46632 -3.08369
C -0.78143 -0.81721 -3.23060
C -2.40302 -1.80940 -1.64602
C 1.54355 -1.43801 -2.67097
C -1.25676 -1.93907 -2.53522
C -0.32501 -2.85953 -1.91245
C 1.88214 -2.80377 -0.79652
C 2.64849 -0.90129 -1.88669
C 1.05328 -2.61094 -1.97600
C 0.65012 -0.56571 -3.30260
C -3.43690 -1.07381 5.63910
H -2.90575 1.27871 5.81438
H 0.86522 -4.20723 3.14895
H -0.00023 -2.50122 4.35538
H -3.20805 5.81716 5.48425
H -5.91013 -0.21542 4.00017
H -8.10743 -1.43012 3.79665
H -5.54457 6.17768 4.64858
H -8.08503 -3.83996 3.04741
H -5.29121 2.28325 2.77679
H -5.87562 -4.91028 2.53656
H -6.61809 4.35801 3.26702
*
```

### #2. Construction of initial orbitals for CASSCF calculation

! uks bp86 def2-svp def2/j ri moread noiter

%moinp "NO@|a\_uno.qro" # Name of .qro file from previous calculation

\*xyz 0 2

```
O 0.00000 -0.00000 0.00000 newgto "def2-tzvp" end
N -0.00000 0.00000 1.15045 newgto "def2-tzvp" end
C -3.29075 -0.48076 4.73507
C -2.99548 0.81528 4.83282
C -2.71248 1.72417 3.66344
C -1.22549 2.12548 3.54527
C -0.19145 1.60917 4.32941
C -0.05265 0.62155 5.46795
C 1.37780 -0.04380 5.30973
C 2.00883 0.64008 4.15467
C 2.90662 0.20080 3.18840
C 2.82058 -1.94074 1.73389
C 1.79941 -2.88024 1.66393
C 0.69732 -3.20277 2.70957
C -0.55950 -3.25674 1.78367
C -1.82211 -2.69417 1.98137
C -2.29936 -2.31245 3.33739
C -3.41253 -1.22375 3.43206
S 3.51589 -1.46388 3.30293
N -4.76484 -3.21641 2.96536
O -0.76764 0.36661 6.40036
O -1.83809 -2.79373 4.35543
N -3.00101 3.95130 4.61301
C -3.30158 -0.30317 2.23730
C -2.81031 1.83026 1.14443
O 1.80017 -0.89509 6.04561
C -3.28674 -0.95770 0.94975
O -0.89849 2.90022 2.34273
O 0.64660 -2.21756 3.68512
C -1.28001 3.31084 -0.09004
C -3.70591 5.05381 4.87513
C 0.11944 3.66033 -0.27192
C -3.56062 2.99249 3.87282
C -1.77810 2.86442 1.16231
C -3.20971 1.27392 -0.07945
C -3.03998 1.04766 2.33766
O 0.97019 3.59658 0.81558
C -2.67593 1.72307 -1.34289
C 1.48736 2.60028 2.83085
C -1.72046 2.72881 -1.34767
C -3.44058 -0.15303 -0.18116
C -2.57946 -2.23233 0.82241
C 0.44369 3.27590 2.11685
C -5.95422 -1.25620 3.67420
C -4.77300 -1.94294 3.36192
C 2.65539 2.38912 -0.51374
C -2.17848 -2.62936 -0.46911
C -3.02967 -0.57803 -1.50265
C -7.16673 -1.93501 3.56223
C 1.16291 1.75191 3.85396
C -0.58300 2.63216 -2.25582
C -5.00962 5.25530 4.41295
C 3.23874 1.05432 -0.52700
C -0.43682 1.51302 -0.08364
C 2.53716 2.24361 1.91180
C -7.15866 -3.27034 3.14786
C -4.86637 3.09186 3.37362
C 3.09638 0.94405 1.94976
C -5.92801 -3.86546 2.86267
C -2.55283 0.57908 -2.23221
C 2.85445 0.46451 -1.79801
C 2.82594 -1.71294 -0.70598
C 2.27014 2.94919 0.68928
C -0.91445 -3.29537 -0.65704
C 0.56723 3.18521 -1.56959
C 0.86426 0.87198 -3.21427
C 3.38327 0.28439 0.66043
C -5.59951 4.24669 3.64742
C -0.10888 -3.51752 0.45580
C 3.18996 -1.17451 0.54762
C 1.96065 1.37408 -2.50380
C 1.81962 2.56171 -1.68916
C 1.31219 -3.27126 0.38080
C -1.44975 0.46632 -3.08369
C -0.78143 -0.81721 -3.23060
C -2.40302 -1.80940 -1.64602
C 1.54355 -1.43801 -2.67097
C -1.25676 -1.93907 -2.53522
C -0.32501 -2.85953 -1.91245
C 1.88214 -2.80377 -0.79652
C 2.64849 -0.90129 -1.88669
C 1.05328 -2.61094 -1.97600
C 0.65012 -0.56571 -3.30260
C -3.43690 -1.07381 5.63910
H -2.90575 1.27871 5.81438
H 0.86522 -4.20723 3.14895
H -0.00023 -2.50122 4.35538
H -3.20805 5.81716 5.48425
H -5.91013 -0.21542 4.00017
H -8.10743 -1.43012 3.79665
H -5.54457 6.17768 4.64858
H -8.08503 -3.83996 3.04741
H -5.29121 2.28325 2.77679
H -5.87562 -4.91028 2.53656
H -6.61809 4.35801 3.26702
*
```

### #3. CASSCF/NEVPT2 and SOC calculation

```
! def2-svp def2-svp/c moread ri-nevpt2 pal8
%moinp "NO@!a_gro.gbw" #Name of .gbw file from previous calculation
%maxcore 7000

%casscf
trafostep ri
nel 1
norb 2
mult 2
nroots 2
rel
dosoc true
gtensor true
end
end

*xyz 0 2
O 0.00000 -0.00000 0.00000 newgto "def2-tzvp" end newauxcgo "def2-tzvp/c" end
N -0.00000 0.00000 1.15045 newgto "def2-tzvp" end newauxcgo "def2-tzvp/c" end
C -3.29075 -0.48076 4.73507
C -2.99548 0.81528 4.83282
C -2.71248 1.72417 3.66344
C -1.22549 2.12548 3.54527
C -0.19145 1.60917 4.32941
C -0.05265 0.62155 5.46795
C 1.37780 -0.04380 5.30973
C 2.00883 0.64008 4.15467
C 2.90662 0.20080 3.18840
C 2.82058 -1.94074 1.73389
C 1.79941 -2.88024 1.66393
C 0.69732 -3.20277 2.70957
C -0.55950 -3.25674 1.78367
C -1.82211 -2.69417 1.98137
C -2.29936 -2.31245 3.33739
C -3.41253 -1.22375 3.43206
S 3.51589 -1.46388 3.30293
N -4.76484 -3.21641 2.96536
O -0.76764 0.36661 6.40036
O -1.83809 -2.79373 4.35543
N -3.00101 3.95130 4.61301
C -3.30158 -0.30317 2.23730
C -2.81031 1.83026 1.14443
O 1.80017 -0.89509 6.04561
C -3.28674 -0.95770 0.94975
C -0.89849 2.90022 2.34273
O 0.64660 -2.21756 3.68512
C -1.28001 3.31084 -0.09004
C -3.70591 5.05381 4.87513
C 0.11944 3.66033 -0.27192
C -3.56062 2.99249 3.87282
C -1.77810 2.86442 1.16231
C -3.20971 1.27392 -0.07945
C -3.03998 1.04766 2.33766
C 0.97019 3.59658 0.81558
C -2.67593 1.72307 -1.34289
C 1.48736 2.60028 2.83085
C -1.72046 2.72881 -1.34767
C -3.44058 -0.15303 -0.18116
C -2.57946 -2.23233 0.82241
C 0.44369 3.27590 2.11685
C -5.95422 -1.25620 3.67420
C -4.77300 -1.94294 3.36192
C 2.65539 2.38912 -0.51374
C -2.17848 -2.62936 -0.46911
C -3.02967 -0.57803 -1.50265
C -7.16673 -1.93501 3.56223
C 1.16291 1.75191 3.85396
C -0.58300 2.63216 -2.25582
C -5.00962 5.25530 4.41295
C 3.23874 1.05432 -0.52700
C -0.43682 1.51302 -0.08364
C 2.53716 2.24361 1.91180
C -7.15866 -3.27034 3.14786
C -4.86637 3.09186 3.37362
C 3.09638 0.94405 1.94976
C -5.92801 -3.86546 2.86267
C -2.55283 0.57908 -2.23221
C 2.85445 0.46451 -1.79801
C 2.82594 -1.71294 -0.70598
C 2.27014 2.94919 0.68928
C -0.91445 -3.29537 -0.65704
C 0.56723 3.18521 -1.56959
C 0.86426 0.87198 -3.21427
C 3.38327 0.28439 0.66043
C -5.59951 4.24669 3.64742
C -0.10888 -3.51752 0.45580
C 3.18996 -1.17451 0.54762
C 1.96065 1.37408 -2.50380
C 1.91962 2.56171 -1.68916
C 1.31219 -3.27126 0.38080
C -1.44975 0.46632 -3.08369
C -0.78143 -0.81721 -3.23060
C -2.40302 -1.80940 -1.64402
C 1.54355 -1.43801 -2.67097
C -1.25676 -1.93907 -2.53522
C -0.32501 -2.85953 -1.91245
C 1.88214 -2.80377 -0.79652
C 2.64849 -0.90129 -1.88669
C 1.05328 -2.61094 -1.97600
C 0.65012 -0.56571 -3.30260
H -3.43690 -1.07381 5.63910
H -2.90575 1.27871 5.81438
H 0.86522 -4.20723 3.14895
H -0.00023 -2.50122 4.35538
H -3.20805 5.81716 5.48425
H -5.91013 -0.21542 4.00017
```

```
H -8.10743 -1.43012 3.79665
H -5.54457 6.17768 4.64858
H -8.08503 -3.83996 3.04741
H -5.29121 2.28325 2.77679
H -5.87562 -4.91028 2.53656
H -6.61809 4.35801 3.26702*
```

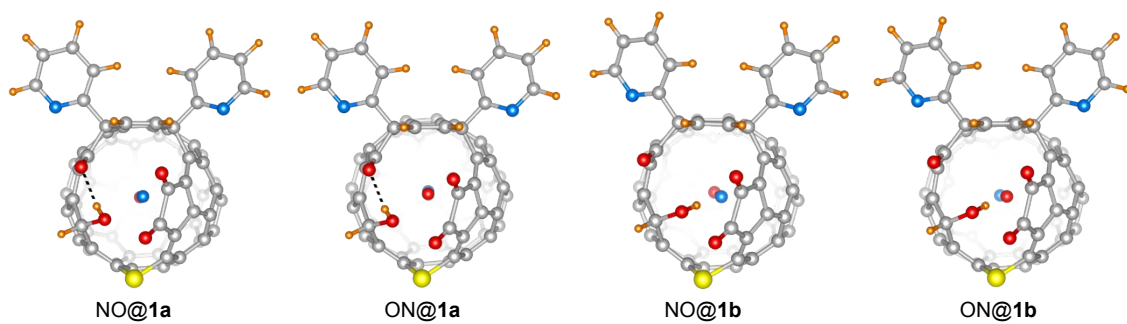

**Figure S1.** Optimized geometries around the hydroxy group of **1** series.

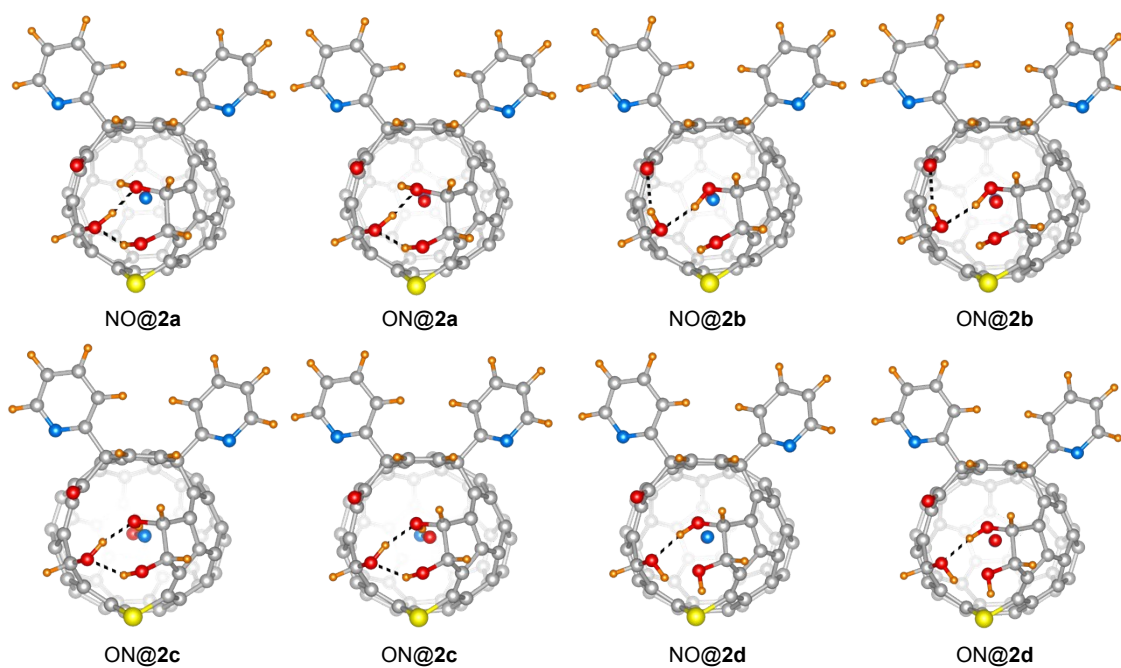

**Figure S2.** Optimized geometries around the hydroxy groups of **2** series.

**Table S4.** Total electronic energy including zero-point energies of the series of NO@1.

|       | Electronic energy<br>+<br>zero-point energy / Eh | $E_{O-up} - E_{N-up}$<br>/ $\text{cm}^{-1}$ | $\Delta E$ / $\text{kcal mol}^{-1}$ |
|-------|--------------------------------------------------|---------------------------------------------|-------------------------------------|
| NO@1a | -3760.66838973                                   | 1.80                                        | 0                                   |
| ON@1a | -3760.66838153                                   |                                             | 0.0052                              |
| NO@1b | -3760.65931997                                   | 178.01                                      | 5.7140                              |
| ON@1b | -3760.65851083                                   |                                             | 6.2237                              |

**Table S5.** Total electronic energy including zero-point energies of the series of NO@2.

|       | Electronic energy<br>+<br>zero-point energy / Eh | $E_{O-up} - E_{N-up}$<br>/ $\text{cm}^{-1}$ | $\Delta E$ / $\text{kcal mol}^{-1}$ |
|-------|--------------------------------------------------|---------------------------------------------|-------------------------------------|
| NO@2a | -3763.02500604                                   | 30.33                                       | 0.3429                              |
| ON@2a | -3763.02486819                                   |                                             | 0.4297                              |
| NO@2b | -3763.02475723                                   | -174.48                                     | 0.4996                              |
| ON@2b | -3763.02555030                                   |                                             | 0                                   |
| ON@2c | -3763.02121401                                   | 256.20                                      | 2.7319                              |
| ON@2c | -3763.02004945                                   |                                             | 3.4655                              |
| NO@2d | -3763.01514235                                   | -1.36                                       | 6.5570                              |
| ON@2d | -3763.01514852                                   |                                             | 6.5531                              |

**Table S6.** Theoretical  $g$ -values for NO molecules caged in 2c and 2d.

|                 | NO@2c | ON@2c | NO@2d | ON@2d |
|-----------------|-------|-------|-------|-------|
| $g_{\parallel}$ | 1.506 | 1.224 | 0.404 | 0.483 |
| $g_{\perp}$     | 1.939 | 1.843 | 1.188 | 1.292 |



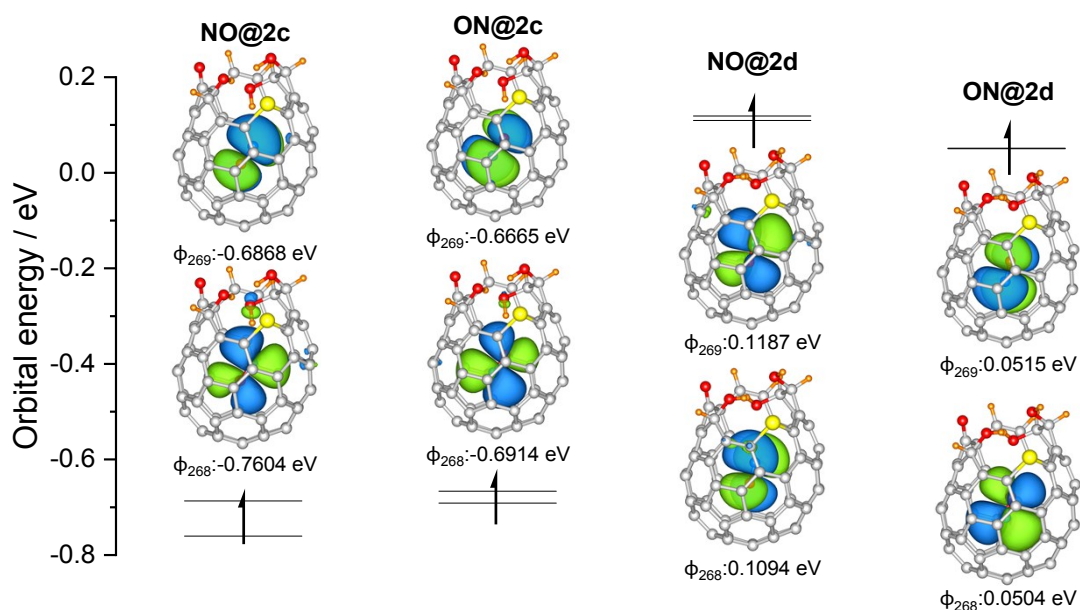

**Figure S3.** CASSCF orbital energy and electron density map (isovalue = 0.01) for NO molecules caged in **2c** and **2d**.

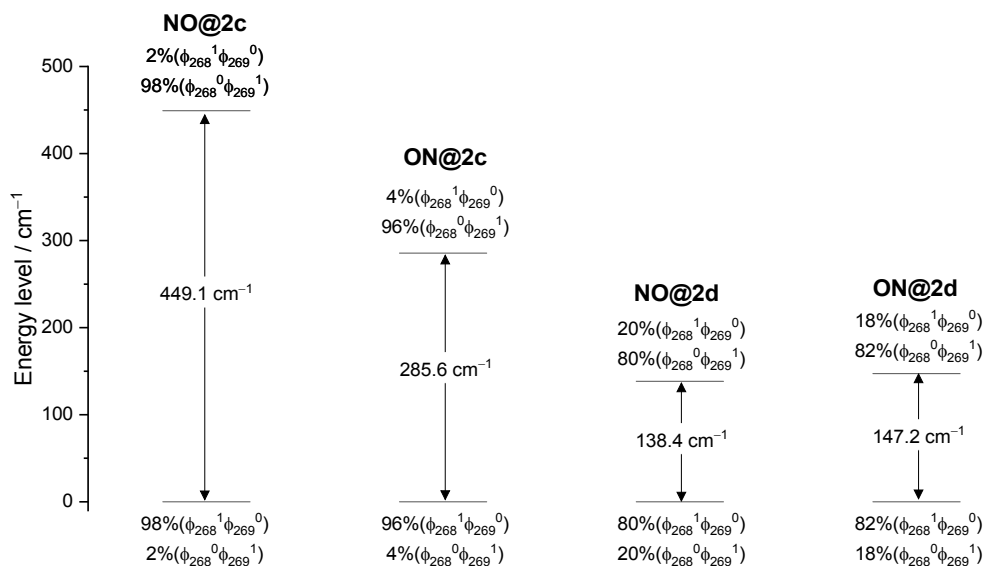

**Figure S4.** Energy levels and compositions of the ground and first-excited states of NO molecules caged in **2c** and **2d**.

Optimized geometries of the present compounds are summarized below.

|            |          |          |            |          |          |            |          |          |
|------------|----------|----------|------------|----------|----------|------------|----------|----------|
| NO@1a      |          |          | C -1.77810 | 2.86442  | 1.16231  | C -5.59951 | 4.24669  | 3.64742  |
| O 0.00000  | 0.00000  | 0.00000  | C -3.20971 | 1.27392  | -0.07945 | C -0.10888 | -3.51752 | 0.45580  |
| N 0.00000  | 0.00000  | 1.15045  | C -3.03998 | 1.04766  | 2.33766  | C 3.18996  | -1.17451 | 0.54762  |
| C -3.29075 | -0.48076 | 4.73507  | C 0.97019  | 3.59658  | 0.81558  | C 1.96065  | 1.37408  | -2.50380 |
| C -2.99548 | 0.81528  | 4.83282  | C -2.67593 | 1.72307  | -1.34289 | C 1.81962  | 2.56171  | -1.68916 |
| C -2.71248 | 1.72417  | 3.66344  | C 1.48736  | 2.60028  | 2.83085  | C 1.31219  | -3.27126 | 0.38080  |
| C -1.22549 | 2.12548  | 3.54527  | C -1.72046 | 2.72881  | -1.34767 | C -1.44975 | 0.46632  | -3.08369 |
| C -0.19145 | 1.60917  | 4.32941  | C -3.44058 | -0.15303 | -0.18116 | C -0.78143 | -0.81721 | -3.23060 |
| C -0.05265 | 0.62155  | 5.46795  | C -2.57946 | -2.23233 | 0.82241  | C -2.40302 | -1.80940 | -1.64602 |
| C 1.37780  | -0.04380 | 5.30973  | C 0.44369  | 3.27590  | 2.11685  | C 1.54355  | -1.43801 | -2.67097 |
| C 2.00883  | 0.64008  | 4.15467  | C -5.95422 | -1.25620 | 3.67420  | C -1.25676 | -1.93907 | -2.53522 |
| C 2.90662  | 0.20080  | 3.18840  | C -4.77300 | -1.94294 | 3.36192  | C -0.32501 | -2.85953 | -1.91245 |
| C 2.82058  | -1.94074 | 1.73389  | C 2.65539  | 2.38912  | -0.51374 | C 1.88214  | -2.80377 | -0.79652 |
| C 1.79941  | -2.88024 | 1.66393  | C -2.17848 | -2.62936 | -0.46911 | C 2.64849  | -0.90129 | -1.88669 |
| C 0.69732  | -3.20277 | 2.70957  | C -3.02967 | -0.57803 | -1.50265 | C 1.05328  | -2.61094 | -1.97600 |
| C -0.55950 | -3.25674 | 1.78367  | C -7.16673 | -1.93501 | 3.56223  | C 0.65012  | -0.56571 | -3.30260 |
| C -1.82211 | -2.69417 | 1.98137  | C 1.16291  | 1.75191  | 3.85396  | H -3.43690 | -1.07381 | 5.63910  |
| C -2.29936 | -2.31245 | 3.33739  | C -0.58300 | 2.63216  | -2.25582 | H -2.90575 | 1.27871  | 5.81438  |
| C -3.41253 | -1.22375 | 3.43206  | C -5.00962 | 5.25530  | 4.41295  | H 0.86522  | -4.20723 | 3.14895  |
| S 3.51589  | -1.46388 | 3.30293  | C 3.23874  | 1.05432  | -0.52700 | H -0.00023 | -2.50122 | 4.35538  |
| N -4.76484 | -3.21641 | 2.96536  | C -0.43682 | 1.51302  | -3.08364 | H -3.20805 | 5.81716  | 5.48425  |
| O -0.76764 | 0.36661  | 6.40036  | C 2.53716  | 2.24361  | 1.91180  | H -5.91013 | -0.21542 | 4.00017  |
| O -1.83809 | -2.79373 | 4.35543  | C -7.15866 | -3.27034 | 3.14786  | H -8.10743 | -1.43012 | 3.79665  |
| N -3.00101 | 3.95130  | 4.61301  | C -4.86637 | 3.09186  | 3.37362  | H -5.54457 | 6.17768  | 4.64858  |
| C -3.30158 | -0.30317 | 2.23730  | C 3.09638  | 0.94405  | 1.94976  | H -8.08503 | -3.83996 | 3.04741  |
| C -2.81031 | 1.83026  | 1.14443  | C -5.92801 | -3.86546 | 2.86267  | H -5.29121 | 2.28325  | 2.77679  |
| O 1.80017  | -0.89509 | 6.04561  | C -2.55283 | 0.57908  | -2.23221 | H -5.87562 | -4.91028 | 2.53656  |
| C -3.28674 | -0.95770 | 0.94975  | C 2.85445  | 0.46451  | -1.79801 | H -6.61809 | 4.35801  | 3.26702  |
| C -0.89849 | 2.90022  | 2.34273  | C 2.82594  | -1.71294 | -0.70598 |            |          |          |
| O 0.64660  | -2.21756 | 3.68512  | C 2.27014  | 2.94919  | 0.68928  |            |          |          |
| C -1.28001 | 3.31084  | -0.09004 | C -0.91445 | -3.29537 | -0.65704 |            |          |          |
| C -3.70591 | 5.05381  | 4.87513  | C 0.56723  | 3.18521  | -1.56959 |            |          |          |
| C 0.11944  | 3.66033  | -0.27192 | C 0.86426  | 0.87198  | -3.21427 |            |          |          |
| C -3.56062 | 2.99249  | 3.87282  | C 3.38327  | 0.28439  | 0.66043  |            |          |          |

|            |            |          |            |           |          |            |          |          |
|------------|------------|----------|------------|-----------|----------|------------|----------|----------|
| ON@1a      | C -3.11700 | 1.16147  | 2.01216    | C 1.79826 | 2.20316  | -2.08244   |          |          |
| N 0.00000  | 0.00000    | 0.00000  | C 0.83522  | 3.59589   | 0.19801  | C 1.42369  | -3.24605 | 0.88775  |
| O 0.00000  | 0.00000    | 1.14865  | C -2.67210 | 1.25564   | -1.71873 | C -1.35094 | -0.21496 | -3.20275 |
| C -3.36994 | 0.03115    | 4.62049  | C 1.32070  | 2.96016   | 2.36177  | C -0.63519 | -1.47846 | -3.12390 |
| C -3.13925 | 1.33952    | 4.51220  | C -1.75363 | 2.28543   | -1.86356 | C -2.26983 | -2.26868 | -1.44247 |
| C -2.86476 | 2.06052    | 3.21714  | C -3.40340 | -0.44027  | -0.28716 | C 1.68932  | -1.91092 | -2.41103 |
| C -1.39468 | 2.50913    | 3.07395  | C -2.50978 | -2.30360  | 1.05586  | C -1.09303 | -2.49270 | -2.26994 |
| C -0.37057 | 2.17157    | 3.96092  | C 0.27901  | 3.47351   | 1.52058  | C -0.15143 | -3.26642 | -1.48419 |
| C -0.23410 | 1.40172    | 5.25635  | C -5.98459 | -0.98215  | 3.73753  | C 2.01394  | -2.94670 | -0.33336 |
| C 1.21253  | 0.75372    | 5.23853  | C -4.79059 | -1.66814  | 3.47651  | C 2.74795  | -1.21296 | -1.69355 |
| C 1.85882  | 1.25809    | 4.00122  | C 2.60006  | 2.25303   | -0.87227 | C 1.21806  | -2.97641 | -1.55019 |
| C 2.79795  | 0.69797    | 3.14183  | C -2.05646 | -2.88502  | -0.14536 | C 0.78807  | -1.18599 | -3.19839 |
| C 2.83577  | -1.65505   | 2.05069  | C -2.94042 | -1.05451  | -1.51350 | H -3.50730 | -0.41567 | 5.60638  |
| C 1.85389  | -2.63645   | 2.10453  | C -7.18163 | -1.69662  | 3.70931  | H -3.09173 | 1.95625  | 5.40854  |
| C 0.73172  | -2.83894   | 3.15919  | C 0.99259  | 2.27954   | 3.50212  | H 0.92317  | -3.75690 | 3.75134  |
| C -0.49127 | -3.08839   | 2.22044  | C -0.58591 | 2.08871   | -2.71529 | H -0.03822 | -1.92614 | 4.66365  |
| C -1.77754 | -2.55146   | 2.29304  | C -5.36594 | 5.53206   | 3.24986  | H -3.58507 | 6.42691  | 4.10646  |
| C -2.30959 | -1.98063   | 3.55811  | C 3.22596  | 0.95601   | -0.65232 | H -5.96309 | 0.08562  | 3.96207  |
| C -3.44539 | -0.91563   | 3.45305  | C -0.37545 | 0.85729   | -3.34664 | H -8.13110 | -1.19269 | 3.90757  |
| S 3.45619  | -0.90267   | 3.54156  | C 2.40760  | 2.49479   | 1.54027  | H -5.95545 | 6.45052  | 3.29037  |
| N -4.75652 | -2.97425   | 3.20728  | C -7.14621 | -3.06500  | 3.42644  | H -8.05927 | -3.66340 | 3.39591  |
| O -0.95813 | 1.30608    | 6.21179  | C -5.10302 | 3.20250   | 2.71785  | H -5.48365 | 2.25649  | 2.32908  |
| O -1.87823 | -2.29447   | 4.65202  | C 3.00491  | 1.23890   | 1.80470  | H -5.83024 | -4.72691 | 2.96180  |
| N -3.27328 | 4.42747    | 3.67031  | C -5.90449 | -3.65644  | 3.18395  | H -6.93497 | 4.30546  | 2.38850  |
| C -3.32800 | -0.19774   | 2.12654  | C -2.48253 | -0.01091  | -2.40789 |            |          |          |
| C -2.88282 | 1.75379    | 0.71482  | C 2.90479  | 0.15620   | -1.82170 |            |          |          |
| O 1.63077  | 0.04036    | 6.11085  | C 2.91460  | -1.81840  | -0.39322 |            |          |          |
| C -3.25725 | -1.04915   | 0.96139  | C 2.15814  | 2.98444   | 0.21302  |            |          |          |
| C -1.05566 | 3.08796    | 1.76936  | C -0.76551 | -3.52380  | -0.19186 |            |          |          |
| O 0.61305  | -1.71986   | 3.97058  | C 0.52236  | 2.78937   | -2.09818 |            |          |          |
| C -1.37341 | 3.07995    | -0.70660 | C 0.95006  | 0.25432   | -3.33820 |            |          |          |
| C -4.04391 | 5.51766    | 3.70157  | C 3.35665  | 0.39201   | 0.64779  |            |          |          |
| C 0.01809  | 3.45050    | -0.90722 | C -5.90471 | 4.34283   | 2.75149  |            |          |          |
| C -3.78353 | 3.29600    | 3.18273  | C 0.01104  | -3.53645  | 0.96318  |            |          |          |
| C -1.89356 | 2.82210    | 0.58895  | C 3.21735  | -1.07292  | 0.76750  |            |          |          |
| C -3.22493 | 0.99269    | -0.41173 | C 2.00513  | 0.90603   | -2.68958 |            |          |          |

|            |          |          |            |          |          |            |          |          |
|------------|----------|----------|------------|----------|----------|------------|----------|----------|
| NO@Ib      |          |          | C 3.40024  | -0.46352 | 1.90355  | C -1.96332 | -2.88555 | -0.79716 |
| O 0.00000  | 0.00000  | 0.00000  | C -0.59260 | -3.43904 | 1.62917  | C -1.48244 | 3.22236  | 0.16498  |
| N 0.00000  | 0.00000  | 1.14753  | C 2.43970  | -1.80822 | -1.47311 | C 0.82642  | -0.93303 | -3.12951 |
| C 3.93202  | 1.48332  | 3.92507  | C -0.80544 | -2.14351 | 3.52520  | C 0.04940  | 0.27648  | -3.35203 |
| C 3.75543  | 0.21519  | 4.29435  | C 1.57961  | -2.83993 | -1.12774 | C 1.86494  | 1.60067  | -2.31344 |
| C 3.37750  | -0.90825 | 3.36302  | C 3.27052  | 0.27406  | -0.81486 | C -2.16472 | 0.89264  | -2.44965 |
| C 1.94346  | -1.42248 | 3.61099  | C 2.49662  | 2.48299  | -0.05081 | C 0.56333  | 1.52231  | -2.96129 |
| C 1.03862  | -0.84411 | 4.50539  | C 0.13827  | -2.88236 | 2.73800  | C -0.29738 | 2.49932  | -2.32214 |
| C 1.02993  | 0.28844  | 5.51735  | C 6.41151  | 2.11833  | 2.55496  | C -2.23639 | 2.54322  | -0.78605 |
| C -0.44334 | 0.87463  | 5.51255  | C 5.18907  | 2.61652  | 2.08507  | C -3.05983 | 0.45574  | -1.38577 |
| C -1.21711 | -0.01370 | 4.60380  | C -2.57684 | -2.54704 | 0.47509  | C -1.63851 | 2.18641  | -2.06464 |
| C -2.29751 | 0.22700  | 3.76137  | C 1.81448  | 2.61662  | -1.27804 | C -1.34686 | -0.04085 | -3.09673 |
| C -2.62432 | 2.08853  | 1.97823  | C 2.59336  | 0.43947  | -2.08621 | H 4.14982  | 2.24548  | 4.67550  |
| C -1.67945 | 3.02198  | 1.56272  | C 7.59053  | 2.70547  | 2.09381  | H 3.83091  | -0.05795 | 5.34552  |
| C -0.36700 | 3.41783  | 2.31603  | C -0.36513 | -1.12664 | 4.32778  | H -0.45144 | 4.33585  | 2.91584  |
| C 0.62829  | 3.54774  | 1.12646  | C 0.29118  | -2.95378 | -1.80225 | H 0.11709  | 1.58404  | 2.66771  |
| C 1.95565  | 3.12364  | 1.13436  | C 6.14393  | -4.06399 | 4.19100  | H 4.55520  | -4.68712 | 5.53124  |
| C 2.75138  | 3.08015  | 2.39766  | C -3.24752 | -1.25893 | 0.36134  | H 6.42922  | 1.29025  | 3.26518  |
| C 3.85133  | 1.97141  | 2.50622  | C -0.08856 | -2.00405 | -2.75800 | H 8.56078  | 2.34012  | 2.43999  |
| S -2.95306 | 1.87817  | 3.71409  | C -2.02621 | -1.98633 | 2.77769  | H 6.81039  | -4.88819 | 4.45375  |
| N 5.11381  | 3.62819  | 1.21806  | C 7.51028  | 3.76556  | 1.18762  | H 8.40736  | 4.25537  | 0.80322  |
| O 1.86615  | 0.66894  | 6.29140  | C 5.62398  | -2.06831 | 2.95486  | H 5.87781  | -1.29334 | 2.22910  |
| O 2.58269  | 3.87145  | 3.29266  | C -2.66011 | -0.72070 | 2.71549  | H 6.13158  | 5.01956  | 0.07349  |
| N 4.02757  | -2.96941 | 4.50350  | C 6.24232  | 4.19036  | 0.78174  | H 7.49215  | -3.14238 | 2.76259  |
| C 3.56108  | 0.85635  | 1.52659  | C 2.07288  | -0.84723 | -2.50141 |            |          |          |
| C 3.02409  | -1.45967 | 0.92586  | C -3.14893 | -0.88145 | -1.03905 |            |          |          |
| O -0.79944 | 1.81168  | 6.17294  | C -3.06917 | 1.45087  | -0.33972 |            |          |          |
| C 3.28463  | 1.26700  | 0.16633  | C -1.93680 | -2.87674 | 1.65430  |            |          |          |
| C 1.46324  | -2.40566 | 2.63313  | C 0.48968  | 3.18171  | -1.30577 |            |          |          |
| O 0.04805  | 2.39893  | 3.19021  | C -0.66766 | -3.42634 | -0.82397 |            |          |          |
| C 1.42330  | -3.21039 | 0.26975  | C -1.43506 | -1.44891 | -2.73403 |            |          |          |
| C 4.88612  | -3.95149 | 4.78889  | C -3.22632 | -0.30312 | 1.41522  |            |          |          |
| C 0.04573  | -3.65005 | 0.42177  | C 6.51742  | -3.09601 | 3.25475  |            |          |          |
| C 4.38120  | -2.05073 | 3.60376  | C -0.09970 | 3.54828  | -0.09634 |            |          |          |
| C 2.10286  | -2.52653 | 1.31237  | C -3.16189 | 1.12167  | 1.03143  |            |          |          |
| C 3.15637  | -1.11728 | -0.42822 | C -2.33998 | -1.86386 | -1.75049 |            |          |          |

|            |           |          |            |            |          |            |          |          |
|------------|-----------|----------|------------|------------|----------|------------|----------|----------|
| ON@Ib      | C 3.22817 | 0.69545  | 2.16903    | C -0.66731 | -3.31755 | -1.10026   |          |          |
| N 0.00000  | 0.00000   | 0.00000  | C 0.65715  | -3.51003   | 1.40599  | C -2.56820 | 2.44446  | 0.19241  |
| O 0.00000  | 0.00000   | 1.14896  | C 3.04725  | -0.64375   | -1.33947 | C 1.32983  | -0.29999 | -3.08464 |
| C 2.86182  | 2.53801   | 4.32194  | C -0.14163 | -2.53118   | 3.33530  | C 0.17285  | 0.55107  | -3.31589 |
| C 3.15309  | 1.27045   | 4.61198  | C 2.61579  | -1.94349   | -1.12049 | C 1.29247  | 2.36691  | -2.06022 |
| C 3.28173  | 0.16258   | 3.59782  | C 2.99530  | 1.54024    | -0.51069 | C -2.16303 | 0.23544  | -2.58049 |
| C 2.12940  | -0.85987  | 3.69458  | C 1.40451  | 3.23992    | 0.29025  | C 0.15801  | 1.86464  | -2.82238 |
| C 1.01924  | -0.72380  | 4.53316  | C 1.05688  | -2.80896   | 2.59879  | C -1.04380 | 2.40264  | -2.21384 |
| C 0.52447  | 0.24517   | 5.59336  | C 5.00406  | 4.14352    | 3.19553  | C -2.95108 | 1.61004  | -0.85221 |
| C -1.05806 | 0.24216   | 5.49215  | C 3.71216  | 4.19472    | 2.65518  | C -2.89489 | -0.58134 | -1.62066 |
| C -1.38556 | -0.79327  | 4.47536  | C -1.44097 | -3.32732   | 0.12888  | C -2.18417 | 1.59837  | -2.08951 |
| C -2.42255 | -0.90388  | 3.55496  | C 0.80086  | 3.20807    | -0.98422 | C -1.01649 | -0.27770 | -3.19792 |
| C -3.31496 | 0.83392   | 1.84308  | C 2.38613  | 1.54213    | -1.82649 | H 2.73063  | 3.26621  | 5.12446  |
| C -2.76494 | 2.07953   | 1.55668  | C 5.90250  | 5.15980    | 2.86825  | H 3.26142  | 0.96328  | 5.65083  |
| C -1.74893 | 2.87706   | 2.43924  | C -0.16374 | -1.48859   | 4.22089  | H -2.21050 | 3.65374  | 3.06647  |
| C -0.79675 | 3.44940   | 1.34972  | C 1.50753  | -2.47175   | -1.90853 | H -0.62270 | 1.34417  | 2.76284  |
| C 0.58991  | 3.54198   | 1.45374  | C 6.96418  | -1.80090   | 4.53511  | H 5.63892  | -3.04665 | 5.71863  |
| C 1.26439  | 3.69722   | 2.77767  | C -2.53642 | -2.37271   | 0.01980  | H 5.28951  | 3.32332  | 3.85610  |
| C 2.69088  | 3.06957   | 2.92682  | C 0.86059  | -1.65822   | -2.84629 | H 6.91811  | 5.14941  | 3.27211  |
| S -3.64739 | 0.38327   | 3.53231  | C -1.28372 | -2.77885   | 2.49388  | H 7.87103  | -2.33629 | 4.82397  |
| N 3.31317  | 5.17651   | 1.84430  | C 5.48294  | 6.18834    | 2.02108  | H 6.15223  | 7.00463  | 1.74155  |
| O 1.10688  | 0.85066   | 6.45198  | C 5.81949  | -0.06474   | 3.32785  | H 5.81269  | 0.79196  | 2.65128  |
| O 0.75560  | 4.29631   | 3.69300  | C -2.33944 | -1.83619   | 2.43788  | H 3.80009  | 6.93603  | 0.87036  |
| N 4.57756  | -1.58336  | 4.70998  | C 4.17288  | 6.14929    | 1.53634  | H 7.96116  | -0.36233 | 3.25312  |
| C 2.90259  | 2.00555   | 1.87260  | C 2.41207  | 0.19052    | -2.34747 |            |          |          |
| C 3.31184  | -0.29078  | 1.11549  | C -2.49884 | -1.87949   | -1.34733 |            |          |          |
| O -1.77866 | 0.92461   | 6.16732  | C -3.34118 | 0.25648    | -0.53252 |            |          |          |
| C 2.57550  | 2.38855   | 0.51572  | C -0.79852 | -3.48616   | 1.34177  |            |          |          |
| C 2.11309  | -1.87282  | 2.63287  | C -0.63459 | 3.24583    | -1.10049 |            |          |          |
| O -1.04376 | 2.02569   | 3.30753  | C 0.73577  | -3.33863   | -1.04091 |            |          |          |
| C 2.52295  | -2.45178  | 0.23888  | C -0.59437 | -1.64230   | -2.91207 |            |          |          |
| C 5.71934  | -2.19650  | 5.03121  | C -2.94018 | -1.56028   | 1.11610  |            |          |          |
| C 1.40213  | -3.37826  | 0.24957  | C 7.00986  | -0.70807   | 3.66535  |            |          |          |
| C 4.62075  | -0.54516  | 3.87390  | C -1.39325 | 3.27558    | 0.06906  |            |          |          |
| C 2.83300  | -1.64843  | 1.36834  | C -3.39005 | -0.18782   | 0.80824  |            |          |          |
| C 3.38767  | 0.17983   | -0.20409 | C -1.33816 | -2.43652   | -2.03215 |            |          |          |

|            |           |          |            |           |          |            |          |          |
|------------|-----------|----------|------------|-----------|----------|------------|----------|----------|
| NO@2a      | C 2.09968 | -0.77349 | 4.16276    | C 2.48861 | -2.25678 | 0.70280    |          |          |
| N 0.00000  | 0.00000   | 1.14982  | C 1.28332  | 1.45660   | 4.16597  | C -1.47750 | 2.06964  | -2.27318 |
| O 0.00000  | 0.00000   | 0.00000  | C -0.67231 | 2.99113   | -1.48774 | C 2.97800  | 0.24841  | -1.87402 |
| S 1.46353  | -3.36041  | 3.47928  | C -1.34549 | -2.71522  | -1.71396 | C 0.59340  | 1.09711  | -3.18949 |
| O -0.70846 | 0.24939   | 4.65666  | C -0.86019 | -3.37279  | -0.51363 | C 2.15502  | -0.71380 | -2.57462 |
| O -1.32410 | -2.16226  | 4.13560  | C -2.60335 | 1.68065   | -1.44815 | C 1.36136  | 2.01695  | -2.46450 |
| O -3.37267 | -0.27409  | 4.59616  | C 1.37434  | -0.62805  | 5.49806  | C 3.71327  | 0.34466  | 0.46345  |
| O 0.64951  | -1.67550  | 6.03738  | C 0.99252  | -2.71291  | -1.74591 | C 2.89515  | -1.72330 | -0.55484 |
| N -5.47588 | 1.58771   | 3.07052  | C 1.63164  | 2.74805   | 2.09536  | C -0.79949 | 5.82415  | 2.95129  |
| C -4.51061 | 2.43438   | 3.43161  | C 0.90424  | 2.51767   | 3.34909  | C 0.65222  | 7.46254  | 3.94776  |
| C -3.21403 | 0.29819   | 3.54034  | C 2.13399  | -1.93219  | -1.77485 | C -0.44039 | 7.16066  | 3.13271  |
| C -6.72361 | 2.04707   | 2.94777  | C -0.53137 | 3.31211   | 0.97979  | N 0.99005  | 5.12373  | 4.38613  |
| C -2.36217 | 2.29652   | 2.24856  | C -2.45659 | -0.60490  | -2.34770 | H -1.36124 | 0.04984  | 5.34706  |
| C -2.90455 | 1.75735   | 1.02516  | C 3.46345  | -0.24151  | 1.75026  | H -0.99445 | -1.25219 | 3.97336  |
| C -3.07577 | 1.87033   | 3.50815  | C -1.87793 | -2.70297  | 3.00131  | H 0.10031  | -2.11214 | 5.35974  |
| C -6.05850 | 4.26888   | 3.55411  | C -1.28532 | 3.15348   | -0.19174 | H -7.48481 | 1.31710  | 2.64953  |
| C -4.75501 | 3.79166   | 3.68439  | C 2.86462  | -1.51128  | 1.91946  | H -6.28270 | 5.32193  | 3.74241  |
| C -3.37166 | 0.37178   | 1.01672  | C 0.52884  | -3.29142  | 1.95780  | H -3.93361 | 4.45017  | 3.97261  |
| C -1.19146 | 3.02496   | 2.23365  | C 3.08157  | 0.83940   | 2.62583  | H -8.10426 | 3.71122  | 3.06481  |
| C -2.49015 | 2.34825   | -0.17025 | C 1.33043  | 6.40228   | 4.55637  | H -2.92967 | 2.25267  | 5.68437  |
| C -0.40454 | 3.33513   | 3.49642  | C 0.71197  | 2.97358   | -1.57480 | H -0.79606 | 3.42184  | 5.67137  |
| C -3.11063 | -1.65532  | -0.35813 | C -1.35372 | -0.23857  | -3.13392 | H 0.32645  | 1.23608  | 6.15628  |
| C -2.73618 | -1.75482  | 2.08968  | C 2.71384  | 2.33604   | -0.57749 | H 2.14952  | -0.36646 | 6.24090  |
| C -7.06984 | 3.38033   | 3.17817  | C 0.92781  | 3.27583   | 0.91327  | H -2.52953 | -3.53836 | 3.31643  |
| C -2.67128 | -2.32616  | 0.77703  | C 2.59090  | 1.59700   | -1.82348 | H 2.18714  | 6.59609  | 5.21232  |
| C -3.46728 | -0.26565  | -0.23553 | C -2.46167 | -1.87110  | -1.64123 | H -1.64719 | 5.55195  | 2.32168  |
| C 1.28155  | -3.10949  | 0.71594  | C 1.00181  | -0.29867  | -3.25124 | H 0.97276  | 8.49343  | 4.11298  |
| C -2.39733 | 2.41143   | 4.74332  | C -0.19927 | -1.12153  | -3.21426 | H -1.00660 | 7.95570  | 2.64074  |
| C 2.32326  | 0.57396   | 3.73311  | C -0.19301 | -2.32401  | -2.49905 |            |          |          |
| C -3.15771 | -0.42489  | 2.22837  | C 1.51405  | 3.13114   | -0.37216 |            |          |          |
| C -1.53285 | -3.20999  | 0.68817  | C -0.86055 | 1.13015   | -3.10464 |            |          |          |
| C -0.85816 | -3.24137  | 1.94345  | C 2.26909  | -1.78196  | 3.23142  |            |          |          |
| C -1.22468 | 3.05013   | 4.73737  | C 2.80942  | 2.00836   | 1.84376  |            |          |          |
| C -0.04282 | 4.83318   | 3.59097  | C 0.58354  | -3.30798  | -0.49541 |            |          |          |
| C -3.08800 | 0.37971   | -1.47966 | C 3.48805  | -0.39979  | -0.67762 |            |          |          |
| C 0.51395  | 0.67593   | 5.22838  | C 3.31204  | 1.74536   | 0.51830  |            |          |          |

|            |           |          |            |           |          |            |          |          |
|------------|-----------|----------|------------|-----------|----------|------------|----------|----------|
| ON@2a      | C 1.89586 | -0.90695 | 4.13884    | C 1.88430 | -2.74786 | 0.83309    |          |          |
| O 0.00000  | 0.00000   | 1.14885  | C 1.60709  | 1.44067   | 3.93144  | C -1.03999 | 2.07843  | -2.55359 |
| N 0.00000  | 0.00000   | 0.00000  | C -0.03431 | 2.85973   | -1.85159 | C 2.89040  | -0.66462 | -1.96102 |
| S 0.67565  | -3.33014  | 3.69275  | C -1.99116 | -2.53820  | -1.55516 | C 0.74178  | 0.58138  | -3.36374 |
| O -0.59920 | 0.76893   | 4.51859  | C -1.64991 | -3.17577  | -0.29598 | C 1.85967  | -1.47362 | -2.57474 |
| O -1.76199 | -1.47590  | 4.22076  | C -2.21231 | 2.03206   | -1.70318 | C 1.70985  | 1.36430  | -2.72239 |
| O -3.31517 | 0.86356   | 4.49122  | C 1.24208  | -0.47929  | 5.45055  | C 3.66379  | -0.52661 | 0.36172  |
| O 0.30625  | -1.28060  | 6.07951  | C 0.28561  | -3.07129  | -1.57259 | C 2.38135  | -2.43709 | -0.46629 |
| N -4.96297 | 3.01293   | 2.78743  | C 2.20725  | 2.42491   | 1.75245  | C 0.55785  | 6.03853  | 2.30812  |
| C -3.82390 | 3.64419   | 3.07529  | C 1.46544  | 2.48095   | 3.01763  | C 2.35325  | 7.38606  | 3.17194  |
| C -3.04893 | 1.28574   | 3.38732  | C 1.57417  | -2.57715  | -1.66645 | C 1.21414  | 7.26876  | 2.37333  |
| C -6.07397 | 3.73373   | 2.61689  | C 0.21289  | 3.36298   | 0.57744  | N 2.15224  | 5.08117  | 3.82249  |
| C -1.78219 | 2.90993   | 1.92267  | C -2.60279 | -0.29793  | -2.38759 | H -1.27087 | 0.79205  | 5.21929  |
| C -2.45130 | 2.39906   | 0.75117  | C 3.30862  | -0.92162  | 1.69600  | H -1.23653 | -0.68290 | 3.98005  |
| C -2.55552 | 2.77505   | 3.21162  | C -2.43926 | -1.97629  | 3.13578  | H -0.33794 | -1.64058 | 5.44173  |
| C -4.90804 | 5.78858   | 3.02277  | C -0.57480 | 3.27298   | -0.57914 | H -6.98685 | 3.17436  | 2.38236  |
| C -3.74674 | 5.03837   | 3.20275  | C 2.44022  | -2.00129  | 1.97814  | H -4.88209 | 6.87745  | 3.11430  |
| C -3.22316 | 1.16272   | 0.86700  | C -0.24175 | -3.18673  | 2.16583  | H -2.79185 | 5.51382  | 3.43422  |
| C -0.47669 | 3.34878   | 1.84810  | C 3.19505  | 0.29309   | 2.46566  | H -7.03456 | 5.67406  | 2.57510  |
| C -1.93067 | 2.76824   | -0.49084 | C 2.77676  | 6.25841   | 3.88164  | H -2.29349 | 3.30965  | 5.34453  |
| C 0.37889  | 3.58471   | 3.08216  | C 1.30878  | 2.52102   | -1.92892 | H 0.05002  | 3.95434  | 5.23766  |
| C -3.45051 | -0.98632  | -0.31444 | C -1.45707 | -0.26526  | -3.19685 | H 0.65496  | 1.62644  | 5.92776  |
| C -3.07463 | -0.94492  | 2.13538  | C 3.12749  | 1.53716   | -0.86441 | H 2.06720  | -0.33454 | 6.17127  |
| C -6.10189 | 5.12597   | 2.72385  | C 1.62476  | 2.99022   | 0.52267  | H -3.25740 | -2.61188 | 3.52102  |
| C -3.15871 | -1.63280  | 0.88086  | C 2.82099  | 0.73542   | -2.03764 | H 3.66051  | 6.31017  | 4.52831  |
| C -3.47938 | 0.45311   | -0.32239 | C -2.88556 | -1.45974  | -1.56772 | H -0.33443 | 5.91104  | 1.69439  |
| C 0.51428  | -3.29662  | 0.91735  | C 0.82095  | -0.87018  | -3.29341 | H 2.90156  | 8.32749  | 3.24851  |
| C -1.75307 | 3.25633   | 4.39619  | C -0.53488 | -1.39105  | -3.18827 | H 0.84011  | 8.12440  | 1.80521  |
| C 2.41339  | 0.30924   | 3.58837  | C -0.79166 | -2.49295  | -2.36558 |            |          |          |
| C -3.18076 | 0.45257   | 2.14831  | C 2.14366  | 2.60042   | -0.74080 |            |          |          |
| C -2.25055 | -2.75544  | 0.88111  | C -0.66521 | 0.95175   | -3.29112 |            |          |          |
| C -1.58152 | -2.82380  | 2.13806  | C 1.81809  | -2.00815  | 3.30549  |            |          |          |
| C -0.46599 | 3.60729   | 4.33900  | C 3.18229  | 1.41690   | 1.57734  |            |          |          |
| C 1.07344  | 4.96323   | 3.04399  | C -0.22904 | -3.44025  | -0.27476 |            |          |          |
| C -2.98122 | 0.87905   | -1.61801 | C 3.25811  | -1.30054  | -0.70725 |            |          |          |
| C 0.69664  | 0.95606   | 5.05668  | C 3.59153  | 0.92745   | 0.28461  |            |          |          |

|            |           |          |            |           |          |            |          |          |
|------------|-----------|----------|------------|-----------|----------|------------|----------|----------|
| NO@2b      | C 1.60502 | 1.37893  | 4.26791    | C 3.21187 | 0.68778  | 0.92359    |          |          |
| N 0.00000  | 0.00000   | 1.15037  | C -0.67234 | 2.02510   | 4.10756  | C -2.41609 | -0.08740 | -2.35872 |
| O 0.00000  | 0.00000   | 0.00000  | C -2.73058 | 1.12793   | -1.62610 | C 1.64273  | 2.47020  | -1.81553 |
| S 3.31594  | -0.70416  | 3.75161  | C 1.49179  | -2.76786  | -1.50409 | C -0.36689 | 0.99281  | -3.20060 |
| O -0.73928 | -0.28995  | 4.18326  | C 2.23104  | -2.72131  | -0.25343 | C 1.97654  | 1.21701  | -2.45658 |
| O 0.72461  | -2.51712  | 4.37885  | C -2.80209 | -1.20171  | -1.51687 | C -0.70053 | 2.17613  | -2.53005 |
| O -1.92538 | -2.81193  | 4.61654  | C 0.93358  | 0.83303   | 5.52159  | C 1.86343  | 3.20473  | 0.51403  |
| O 1.35199  | -0.35831  | 6.09708  | C 2.85797  | -0.86937  | -1.50449 | C 3.10185  | 1.28723  | -0.36508 |
| N -4.62252 | -3.43743  | 3.03955  | C -1.39445 | 3.00653   | 1.97197  | C -5.39686 | 2.70956  | 2.66671  |
| C -4.74236 | -2.14640  | 3.35410  | C -1.70470 | 2.32822   | 3.22918  | C -6.00275 | 4.86566  | 3.54128  |
| C -2.26531 | -2.36102  | 3.53648  | C 2.89796  | 0.51063   | -1.57487 | C -6.32533 | 3.74558  | 2.77249  |
| C -5.72805 | -4.17626  | 2.91507  | C -3.03513 | 1.50758   | 0.81982  | N -3.86844 | 3.90004  | 4.08009  |
| C -3.32673 | -0.53755  | 2.14426  | C -0.82825 | -2.45273  | -2.28505 | H -0.07536 | -0.98137 | 4.36122  |
| C -3.15786 | -1.32593  | 0.94855  | C 2.11806  | 2.71060   | 1.83784  | H -0.11342 | -2.85552 | 4.77176  |
| C -3.43721 | -1.32485  | 3.43508  | C 0.90895  | -3.18941  | 3.17141  | H 1.64762  | -0.98709 | 5.41703  |
| C -7.13901 | -2.30570  | 3.42218  | C -3.28338 | 0.76524   | -0.34305 | H -5.58221 | -5.23127 | 2.65707  |
| C -5.98660 | -1.53232  | 3.55477  | C 2.77570  | 1.48214   | 2.08625  | H -8.12509 | -1.85794 | 3.57111  |
| C -2.32507 | -2.52388  | 1.00823  | C 2.79538  | -1.47365  | 2.22921  | H -6.03746 | -0.47210 | 3.80773  |
| C -3.24576 | 0.83851   | 2.08581  | C 0.97460  | 3.07932   | 2.64082  | H -7.88855 | -4.30136 | 2.98331  |
| C -3.33595 | -0.68029  | -0.27809 | C -4.75904 | 4.88864   | 4.17910  | H -3.65867 | -0.91867 | 5.59671  |
| C -3.11910 | 1.70533   | 3.32408  | C -1.90329 | 2.23818   | -1.70712 | H -3.45856 | 1.50436  | 5.49802  |
| C -0.47376 | -3.55679  | -0.24989 | C -0.43227 | -1.36483  | -3.07693 | H -1.24218 | 0.78643  | 5.89414  |
| C -0.31107 | -3.28149  | 2.20117  | C -0.27242 | 3.52637   | -0.66229 | H 1.01554  | 1.61200  | 6.30074  |
| C -7.01251 | -3.65919  | 3.09624  | C -2.16188 | 2.68163   | 0.75633  | H 1.21974  | -4.23256 | 3.38195  |
| C 0.26378  | -3.58421  | 0.92610  | C 0.32335  | 2.94890   | -1.85647 | H -4.46992 | 5.74540  | 4.79919  |
| C -1.80919 | -3.01670  | -0.20686 | C 0.15297  | -3.18276  | -1.50581 | H -5.61423 | 1.81994  | 2.07452  |
| C 3.17482  | -0.79055  | 0.98577  | C 1.00398  | 0.50458   | -3.16818 | H -6.69629 | 5.70245  | 3.64808  |
| C -3.49511 | -0.41964  | 4.63923  | C 0.96277  | -0.94884  | -3.08863 | H -7.28717 | 3.67948  | 2.25758  |
| C 0.67886  | 2.35248   | 3.76388  | C 1.89700  | -1.62635  | -2.29690 |            |          |          |
| C -1.61912 | -2.79639  | 2.26172  | C -1.62963 | 3.02439   | -0.51502 |            |          |          |
| C 1.64231  | -3.15540  | 0.92202  | C -1.25069 | -0.16279  | -3.12744 |            |          |          |
| C 1.97224  | -2.59120  | 2.19844  | C 2.56457  | 0.88901   | 3.40591  |            |          |          |
| C -3.37787 | 0.90859   | 4.58590  | C -0.08615 | 3.51365   | 1.77714  |            |          |          |
| C -4.16970 | 2.83535   | 3.33292  | C 3.01456  | -1.50762  | -0.21830 |            |          |          |
| C -2.04019 | -2.36166  | -1.48152 | C 2.39594  | 2.54270   | -0.57437 |            |          |          |
| C -0.55651 | 0.81507   | 5.03584  | C 0.49486  | 3.70664   | 0.47254  |            |          |          |



|            |           |          |            |           |          |            |          |          |
|------------|-----------|----------|------------|-----------|----------|------------|----------|----------|
| ON@2b      | C 1.55316 | 1.42610  | 4.16279    | C 3.23054 | 0.67045  | 0.86889    |          |          |
| O 0.00000  | 0.00000   | 1.14819  | C -0.71623 | 2.08096   | 3.94072  | C -2.32486 | -0.13648 | -2.52511 |
| N 0.00000  | 0.00000   | 0.00000  | C -2.64900 | 1.09291   | -1.82040 | C 1.73149  | 2.41253  | -1.93489 |
| S 3.26355  | -0.67443  | 3.72142  | C 1.54712  | -2.81924  | -1.53825 | C -0.25359 | 0.92082  | -3.33966 |
| O -0.78615 | -0.22958  | 4.02626  | C 2.25741  | -2.75418  | -0.27205 | C 2.07283  | 1.14708  | -2.54684 |
| O 0.64707  | -2.46465  | 4.31939  | C -2.73484 | -1.23523  | -1.67390 | C -0.59587 | 2.11698  | -2.69682 |
| O -2.00194 | -2.74171  | 4.50546  | C 0.84858  | 0.90022   | 5.40701  | C 1.90395  | 3.18569  | 0.38573  |
| O 1.25071  | -0.28104  | 6.01366  | C 2.92177  | -0.92695  | -1.53970 | C 3.15167  | 1.24810  | -0.43226 |
| N -4.67267 | -3.38497  | 2.89024  | C -1.38586 | 3.03078   | 1.77431  | C -5.40466 | 2.75310  | 2.38219  |
| C -4.78950 | -2.08504  | 3.16648  | C -1.72720 | 2.37539   | 3.03529  | C -6.03011 | 4.92004  | 3.21541  |
| C -2.31781 | -2.31375  | 3.40850  | C 2.97043  | 0.45162   | -1.63271 | C -6.33471 | 3.79077  | 2.45282  |
| C -5.78113 | -4.11787  | 2.75664  | C -3.00439 | 1.51580   | 0.61186  | N -3.91004 | 3.96034  | 3.81724  |
| C -3.33438 | -0.50726  | 1.96283  | C -0.75194 | -2.50730  | -2.37664 | H -0.14358 | -0.93101 | 4.24098  |
| C -3.14498 | -1.31750  | 0.78500  | C 2.12681  | 2.71370   | 1.72327  | H -0.20221 | -2.79217 | 4.69796  |
| C -3.48022 | -1.27202  | 3.26334  | C 0.85720  | -3.16065  | 3.12855  | H 1.54376  | -0.92857 | 5.35035  |
| C -7.18845 | -2.22279  | 3.17542  | C -3.22971 | 0.75386   | -0.54316 | H -5.63796 | -5.18078 | 2.53167  |
| C -6.03308 | -1.45563  | 3.31773  | C 2.77364  | 1.48723   | 2.00748  | H -8.17404 | -1.76313 | 3.28641  |
| C -2.32297 | -2.52064  | 0.88301  | C 2.77135  | -1.46671  | 2.20141  | H -6.08138 | -0.38848 | 3.54032  |
| C -3.24473 | 0.86796   | 1.88335  | C 0.96825  | 3.10263   | 2.49423  | H -7.94370 | -4.22356 | 2.77100  |
| C -3.29151 | -0.69050  | -0.45541 | C -4.80207 | 4.95037   | 3.88270  | H -3.74669 | -0.82831 | 5.41243  |
| C -3.14457 | 1.75569   | 3.10912  | C -1.81606 | 2.19896   | -1.90221 | H -3.53333 | 1.59174  | 5.27767  |
| C -0.44956 | -3.58095  | -0.31674 | C -0.33325 | -1.43468  | -3.17767 | H -1.33505 | 0.85396  | 5.72068  |
| C -0.34179 | -3.26824  | 2.13325  | C -0.20285 | 3.49767   | -0.84331 | H 0.91063  | 1.69159  | 6.17530  |
| C -7.06530 | -3.58573  | 2.88993  | C -2.12649 | 2.68661   | 0.54747  | H 1.16144  | -4.19950 | 3.36717  |
| C 0.26049  | -3.59143  | 0.87624  | C 0.41617  | 2.89641   | -2.01348 | H -4.52724 | 5.81476  | 4.49870  |
| C -1.78277 | -3.03478  | -0.31273 | C 0.20730  | -3.22888  | -1.56347 | H -5.60848 | 1.85651  | 1.79573  |
| C 3.18325  | -0.80678  | 0.95564  | C 1.11339  | 0.42684   | -3.26797 | H -6.72572 | 5.75807  | 3.29565  |
| C -3.55986 | -0.34627  | 4.45050  | C 1.06319  | -1.02489  | -3.16485 | H -7.28401 | 3.71861  | 1.91591  |
| C 0.64409  | 2.39616   | 3.62250  | C 1.97539  | -1.69311  | -2.34072 |            |          |          |
| C -1.64888 | -2.77851  | 2.15669  | C -1.56516 | 3.00445   | -0.71779 |            |          |          |
| C 1.63964  | -3.16561  | 0.89631  | C -1.14387 | -0.22980  | -3.26690 |            |          |          |
| C 1.94254  | -2.58055  | 2.16997  | C 2.52919  | 0.91666   | 3.33142  |            |          |          |
| C -3.43404 | 0.98031   | 4.37782  | C -0.07075 | 3.52702   | 1.59986  |            |          |          |
| C -4.19390 | 2.88653   | 3.07630  | C 3.04597  | -1.54363  | -0.23947 |            |          |          |
| C -1.98112 | -2.39868  | -1.60249 | C 2.45745  | 2.50322   | -0.67888 |            |          |          |
| C -0.62686 | 0.87863   | 4.88114  | C 0.53958  | 3.69341   | 0.30508  |            |          |          |

|          |          |          |          |          |          |          |          |          |
|----------|----------|----------|----------|----------|----------|----------|----------|----------|
| NO@2c    |          |          | 1.29724  | -0.02813 | 4.58071  | 3.17358  | 0.52714  | 1.35965  |
| 0.00000  | 0.00000  | 1.14720  | -0.99924 | 0.57767  | 4.44934  | -2.17434 | 0.81032  | -2.45486 |
| 0.00000  | 0.00000  | 0.00000  | -2.59769 | 1.69466  | -1.38081 | 1.70976  | 3.10278  | -0.72696 |
| 3.15398  | -1.75378 | 3.54495  | 1.78071  | -1.92547 | -2.22537 | -0.12148 | 2.15184  | -2.69745 |
| -0.92629 | -1.65142 | 3.65897  | 2.42207  | -2.29186 | -0.97552 | 2.14876  | 2.15407  | -1.72749 |
| 0.59726  | -3.74473 | 3.33655  | -2.57249 | -0.53185 | -2.08164 | -0.55809 | 3.02707  | -1.69484 |
| -2.26940 | -4.24692 | 3.11876  | 0.55713  | -1.01113 | 5.48570  | 1.72870  | 2.99611  | 1.72446  |
| 1.00682  | -2.29939 | 5.68171  | 3.05547  | -0.11385 | -1.47189 | 3.12201  | 1.52898  | 0.34757  |
| -4.74292 | -4.05994 | 1.07987  | -1.61558 | 2.23942  | 2.74243  | -5.65327 | 1.63105  | 2.99042  |
| -4.90487 | -3.07241 | 1.96261  | -1.98382 | 1.15608  | 3.65330  | -6.38681 | 3.36843  | 4.48182  |
| -2.44634 | -3.40003 | 2.27809  | 3.03950  | 1.20854  | -1.06672 | -6.62685 | 2.55412  | 3.37294  |
| -5.82106 | -4.67940 | 0.59675  | -3.10352 | 1.20661  | 1.01128  | -4.24309 | 2.32968  | 4.80134  |
| -3.41512 | -1.17504 | 1.52068  | -0.48647 | -1.40699 | -3.04651 | -0.60211 | -1.09837 | 2.92828  |
| -3.11180 | -1.50344 | 0.14941  | 1.91404  | 2.08285  | 2.81700  | -0.10586 | -3.07224 | 3.47595  |
| -3.62051 | -2.35675 | 2.43846  | 0.86859  | -3.91020 | 2.00009  | 1.21005  | -2.74603 | 4.83890  |
| -7.29642 | -3.30377 | 1.89067  | -3.22951 | 0.90391  | -0.35221 | -5.63841 | -5.48484 | -0.12363 |
| -6.17001 | -2.65526 | 2.39827  | 2.61842  | 0.86222  | 2.68411  | -8.29722 | -3.00212 | 2.21041  |
| -2.22939 | -2.63603 | -0.12265 | 2.76516  | -1.95528 | 1.81638  | -6.26130 | -1.83945 | 3.11681  |
| -3.37963 | 0.13808  | 1.94651  | 0.69580  | 2.12015  | 3.59521  | -7.97808 | -4.87501 | 0.54837  |
| -3.22358 | -0.47719 | -0.79164 | -5.17724 | 3.21109  | 5.16438  | -3.98836 | -2.73840 | 4.58090  |
| -3.37465 | 0.51989  | 3.41539  | -1.81944 | 2.78003  | -1.00586 | -3.83104 | -0.43260 | 5.35625  |
| -0.23540 | -3.12950 | -1.47634 | -0.08495 | -0.10689 | -3.38971 | -1.63587 | -1.29575 | 5.54245  |
| -0.27676 | -3.69879 | 0.94127  | -0.33056 | 3.65648  | 0.55264  | 0.50936  | -0.54168 | 6.48517  |
| -7.12435 | -4.34034 | 0.97017  | -2.27970 | 2.34309  | 1.42934  | 1.21473  | -4.95225 | 1.86555  |
| 0.40628  | -3.52596 | -0.30970 | 0.37609  | 3.53952  | -0.71310 | -4.95310 | 3.82473  | 6.04469  |
| -1.59538 | -2.66665 | -1.37886 | 0.46582  | -2.34019 | -2.47554 | -5.80553 | 0.97688  | 2.13106  |
| 3.19968  | -0.88300 | 0.91306  | 1.26474  | 1.70880  | -2.71759 | -7.11837 | 4.10803  | 4.81409  |
| -3.77915 | -1.93233 | 3.87415  | 1.28589  | 0.31542  | -3.14176 | -7.55993 | 2.63757  | 2.80998  |
| 0.35807  | 1.03621  | 4.36421  | 2.18922  | -0.57412 | -2.55023 |          |          |          |
| -1.61893 | -3.31403 | 1.02556  | -1.67064 | 3.11141  | 0.40242  |          |          |          |
| 1.76094  | -3.09862 | -0.06293 | -0.95266 | 1.02474  | -3.09948 |          |          |          |
| 1.97799  | -2.99768 | 1.34596  | 2.34629  | -0.16107 | 3.69432  |          |          |          |
| -3.68452 | -0.67073 | 4.29981  | -0.32023 | 2.80334  | 2.84542  |          |          |          |
| -4.46636 | 1.56183  | 3.73270  | 3.15131  | -1.15028 | -0.47070 |          |          |          |
| -1.75908 | -1.61933 | -2.37078 | 2.36892  | 2.76166  | 0.52312  |          |          |          |
| -0.87851 | -0.88415 | 4.87212  | 0.34334  | 3.44960  | 1.74091  |          |          |          |

|            |           |          |            |           |          |            |          |          |
|------------|-----------|----------|------------|-----------|----------|------------|----------|----------|
| ON@2c      | C 1.30355 | 0.11208  | 4.61160    | C 3.17791 | 0.55801  | 1.37136    |          |          |
| O 0.00000  | 0.00000   | 1.14896  | C -0.99085 | 0.72404   | 4.46597  | C -2.17794 | 0.74602  | -2.43984 |
| N 0.00000  | 0.00000   | 0.00000  | C -2.59536 | 1.66582   | -1.39344 | C 1.71964  | 3.07429  | -0.79239 |
| S 3.15314  | -1.65268  | 3.62800  | C 1.76531  | -1.99878  | -2.13205 | C -0.11981 | 2.07023  | -2.72845 |
| O -0.93084 | -1.53096  | 3.75043  | C 2.40810  | -2.32850  | -0.87269 | C 2.15261  | 2.09289  | -1.76359 |
| O 0.58924  | -3.63949  | 3.48781  | C -2.58113 | -0.58210  | -2.02379 | C -0.55064 | 2.97868  | -1.75316 |
| O -2.28317 | -4.13154  | 3.29132  | C 0.56167  | -0.83736  | 5.55021  | C 1.74219  | 3.04278  | 1.66072  |
| O 1.00520  | -2.12123  | 5.78512  | C 3.04996  | -0.17001  | -1.43865 | C 3.12775  | 1.52814  | 0.32848  |
| N -4.76034 | -3.99912  | 1.25168  | C -1.60361 | 2.33472   | 2.70853  | C -5.64011 | 1.76339  | 2.98718  |
| C -4.91665 | -2.98374  | 2.10337  | C -1.97413 | 1.28154   | 3.65338  | C -6.36326 | 3.53632  | 4.44162  |
| C -2.45868 | -3.31123  | 2.42428  | C 3.04091  | 1.16460   | -1.07520 | C -6.60806 | 2.70035  | 3.35012  |
| C -5.84190 | -4.62908  | 0.79038  | C -3.10008 | 1.25608   | 1.01446  | N -4.22595 | 2.49159  | 4.78325  |
| C -3.42036 | -1.10698  | 1.59904  | C -0.50128 | -1.49650  | -2.96468 | H -0.59690 | -1.00539 | 3.00657  |
| C -3.12006 | -1.48002  | 0.23856  | C 1.92520  | 2.16241   | 2.78025  | H -0.11647 | -2.96745 | 3.61053  |
| C -3.62852 | -2.25875  | 2.55381  | C 0.85527  | -3.84605  | 2.15551  | H 1.20817  | -2.59350 | 4.95629  |
| C -7.30916 | -3.20778  | 2.04359  | C -3.22831 | 0.91072   | -0.33882 | H -5.66394 | -5.45737 | 0.09520  |
| C -6.17913 | -2.54818  | 2.52835  | C 2.62477  | 0.93580   | 2.68484  | H -8.30812 | -2.89236 | 2.35568  |
| C -2.24299 | -2.62453  | 0.00048  | C 2.76220  | -1.90757  | 1.90659  | H -6.26560 | -1.70983 | 3.22109  |
| C -3.37982 | 0.21894   | 1.98318  | C 0.70907  | 2.23022   | 3.55947  | H -7.99991 | -4.81733 | 0.75253  |
| C -3.22876 | -0.48367  | -0.73451 | C -5.15452 | 3.38623   | 5.12742  | H -3.99373 | -2.57190 | 4.70785  |
| C -3.36905 | 0.64579   | 3.43977  | C -1.81190 | 2.75929   | -1.05441 | H -3.82511 | -0.24339 | 5.41032  |
| C -0.25417 | -3.16937  | -1.34102 | C -0.09476 | -0.20949  | -3.34938 | H -1.63336 | -1.10946 | 5.62216  |
| C -0.29223 | -3.66080  | 1.09400  | C -0.31605 | 3.67659   | 0.47300  | H 0.51977  | -0.33632 | 6.53449  |
| C -7.14308 | -4.27329  | 1.15561  | C -2.27026 | 2.40120   | 1.39466  | H 1.19559  | -4.89346 | 2.05150  |
| C 0.38845  | -3.53088  | -0.16351 | C 0.38779  | 3.51721   | -0.78967 | H -4.92674 | 4.01701  | 5.99462  |
| C -1.61218 | -2.69807  | -1.25566 | C 0.44810  | -2.41538  | -2.36642 | H -5.79648 | 1.09208  | 2.14193  |
| C 3.19821  | -0.86548  | 0.96950  | C 1.26439  | 1.62063   | -2.73734 | H -7.09052 | 4.28692  | 4.75832  |
| C -3.78256 | -1.78919  | 3.97586  | C 1.27833  | 0.21446   | -3.11744 | H -7.54070 | 2.77746  | 2.78553  |
| C 0.36850  | 1.17310   | 4.36341  | C 2.17907  | -0.66008  | -2.50015 |            |          |          |
| C -1.63255 | -3.26779  | 1.16880  | C -1.65924 | 3.13373   | 0.34278  |            |          |          |
| C 1.74590  | -3.10302  | 0.06665  | C -0.95664 | 0.93466   | -3.09321 |            |          |          |
| C 1.96796  | -2.95958  | 1.47116  | C 2.35000  | -0.05381  | 3.72747  |            |          |          |
| C -3.68175 | -0.51539  | 4.36166  | C -0.30543 | 2.89470   | 2.79103  |            |          |          |
| C -4.45394 | 1.70237   | 3.73110  | C 3.14386  | -1.17508  | -0.40548 |            |          |          |
| C -1.77346 | -1.68205  | -2.28026 | C 2.37961  | 2.76887   | 0.46641  |            |          |          |
| C -0.87556 | -0.72304  | 4.93758  | C 0.35914  | 3.50317   | 1.66576  |            |          |          |

|          |          |          |          |          |          |  |          |          |          |
|----------|----------|----------|----------|----------|----------|--|----------|----------|----------|
| NO@2d    |          |          | 1.71552  | 1.27401  | 4.19358  |  | 3.24033  | 0.75706  | 0.77680  |
| 0.00000  | 0.00000  | 1.15077  | -0.57869 | 1.86890  | 4.14297  |  | -2.49860 | -0.04274 | -2.31832 |
| 0.00000  | 0.00000  | 0.00000  | -2.81511 | 1.14152  | -1.53636 |  | 1.51639  | 2.59097  | -1.83469 |
| 3.49906  | -0.72429 | 3.54497  | 1.50116  | -2.65457 | -1.69532 |  | -0.50784 | 1.11317  | -3.19545 |
| -0.60192 | -0.44996 | 4.18626  | 2.28860  | -2.63032 | -0.47505 |  | 1.85603  | 1.36970  | -2.53164 |
| 0.94500  | -2.55863 | 4.22002  | -2.82980 | -1.19183 | -1.50020 |  | -0.84373 | 2.26597  | -2.47458 |
| -1.86464 | -3.08336 | 4.53242  | 1.09812  | 0.70117  | 5.46071  |  | 1.80406  | 3.24713  | 0.51044  |
| 1.51596  | -0.54700 | 5.94190  | 2.82390  | -0.72556 | -1.68908 |  | 3.06073  | 1.39775  | -0.48367 |
| -4.54302 | -3.52337 | 2.84868  | -1.39512 | 2.92399  | 2.07509  |  | -5.37153 | 2.52464  | 2.91766  |
| -4.63436 | -2.29682 | 3.36645  | -1.64773 | 2.19079  | 3.31689  |  | -5.95657 | 4.67304  | 3.82499  |
| -2.14793 | -2.53112 | 3.49789  | 2.82800  | 0.65708  | -1.71161 |  | -6.30614 | 3.54820  | 3.07410  |
| -5.65380 | -4.24662 | 2.69674  | -3.04822 | 1.43869  | 0.92785  |  | -3.78422 | 3.73452  | 4.24807  |
| -3.25254 | -0.65286 | 2.19252  | -0.85382 | -2.36740 | -2.37175 |  | -0.12145 | -1.25371 | 4.48005  |
| -3.09629 | -1.40116 | 0.96987  | 2.11498  | 2.70739  | 1.80445  |  | 1.72884  | -2.03185 | 4.46217  |
| -3.32411 | -1.48054 | 3.45305  | 1.11407  | -3.19271 | 2.99861  |  | 2.40750  | -0.46495 | 6.30311  |
| -7.02066 | -2.49445 | 3.59198  | -3.31704 | 0.72568  | -0.24905 |  | -5.52858 | -5.24754 | 2.26809  |
| -5.86030 | -1.73704 | 3.75345  | 2.81631  | 1.49142  | 1.98439  |  | -7.99152 | -2.08514 | 3.88269  |
| -2.22742 | -2.57688 | 0.97023  | 2.94717  | -1.45804 | 2.01167  |  | -5.89445 | -0.72803 | 4.16664  |
| -3.20373 | 0.72573  | 2.17620  | 0.99084  | 3.01683  | 2.65770  |  | -7.80365 | -4.40697 | 2.90949  |
| -3.33283 | -0.72244 | -0.22840 | -4.68157 | 4.71129  | 4.39598  |  | -3.46589 | -1.16179 | 5.63228  |
| -3.04991 | 1.55110  | 3.44008  | -2.01760 | 2.27422  | -1.60921 |  | -3.30419 | 1.27133  | 5.61823  |
| -0.39905 | -3.51792 | -0.38083 | -0.51387 | -1.24835 | -3.14718 |  | -1.04891 | 0.59860  | 5.93586  |
| -0.14985 | -3.28884 | 2.07871  | -0.37863 | 3.56233  | -0.57737 |  | 1.19429  | 1.47052  | 6.25149  |
| -6.92134 | -3.77951 | 3.05290  | -2.20041 | 2.63062  | 0.87535  |  | 1.43502  | -4.24038 | 3.17469  |
| 0.37893  | -3.54749 | 0.76880  | 0.18630  | 3.03894  | -1.81112 |  | -4.37090 | 5.57155  | 5.00062  |
| -1.74387 | -3.01672 | -0.27760 | 0.17196  | -3.09405 | -1.64937 |  | -5.60792 | 1.63061  | 2.33910  |
| 3.25575  | -0.72188 | 0.78355  | 0.87392  | 0.65721  | -3.22956 |  | -6.65424 | 5.50093  | 3.96882  |
| -3.34847 | -0.62210 | 4.68998  | 0.86949  | -0.79910 | -3.19913 |  | -7.29348 | 3.46938  | 2.61193  |
| 0.74895  | 2.23941  | 3.75828  | 1.84871  | -1.47962 | -2.46707 |  |          |          |          |
| -1.47481 | -2.86366 | 2.19459  | -1.71955 | 3.02695  | -0.40094 |  |          |          |          |
| 1.74978  | -3.10500 | 0.70975  | -1.36125 | -0.06548 | -3.13062 |  |          |          |          |
| 2.12856  | -2.57572 | 1.98269  | 2.66270  | 0.84373  | 3.28925  |  |          |          |          |
| -3.25376 | 0.70909  | 4.68270  | -0.10673 | 3.46453  | 1.85099  |  |          |          |          |
| -4.11155 | 2.66688  | 3.51632  | 3.05231  | -1.40344 | -0.43484 |  |          |          |          |
| -2.03693 | -2.33107 | -1.52349 | 2.31299  | 2.63904  | -0.61988 |  |          |          |          |
| -0.40468 | 0.63822  | 5.04358  | 0.42455  | 3.71951  | 0.53543  |  |          |          |          |

|          |          |          |          |          |          |          |          |          |
|----------|----------|----------|----------|----------|----------|----------|----------|----------|
| ON@2d    |          |          | 1.76821  | 1.31157  | 4.15858  | 3.25243  | 0.76318  | 0.73061  |
| 0.00000  | 0.00000  | 1.14803  | -0.52692 | 1.90398  | 4.12524  | -2.51946 | -0.06225 | -2.29507 |
| 0.00000  | 0.00000  | 0.00000  | -2.82676 | 1.12932  | -1.52049 | 1.50130  | 2.57390  | -1.87916 |
| 3.54026  | -0.69435 | 3.50831  | 1.48428  | -2.67123 | -1.69181 | -0.53816 | 1.08468  | -3.20432 |
| -0.53989 | -0.41213 | 4.16668  | 2.28378  | -2.63586 | -0.47981 | 1.83252  | 1.34592  | -2.56846 |
| 0.98981  | -2.52854 | 4.22986  | -2.84234 | -1.20390 | -1.46324 | -0.86563 | 2.24439  | -2.49064 |
| -1.81410 | -3.04203 | 4.57552  | 1.16178  | 0.74520  | 5.43392  | 1.81565  | 3.25128  | 0.45678  |
| 1.58682  | -0.49892 | 5.92020  | 2.80754  | -0.74246 | -1.71675 | 3.05899  | 1.39194  | -0.53391 |
| -4.51304 | -3.49473 | 2.92668  | -1.36619 | 2.94216  | 2.05854  | -5.33052 | 2.56013  | 2.94978  |
| -4.59628 | -2.26320 | 3.43382  | -1.60522 | 2.21949  | 3.30857  | -5.90388 | 4.70962  | 3.86226  |
| -2.10854 | -2.50008 | 3.53856  | 2.81250  | 0.64001  | -1.75229 | -6.26194 | 3.58547  | 3.11454  |
| -5.62672 | -4.21756 | 2.79493  | -3.03363 | 1.44836  | 0.94388  | -3.72943 | 3.76748  | 4.26593  |
| -3.22593 | -0.63203 | 2.22865  | -0.87721 | -2.38869 | -2.34582 | -0.06777 | -1.21836 | 4.46788  |
| -3.08255 | -1.39122 | 1.01161  | 2.14171  | 2.72408  | 1.75248  | 1.77638  | -2.00167 | 4.46343  |
| -3.28369 | -1.44863 | 3.49712  | 1.14702  | -3.17032 | 3.01067  | 2.47888  | -0.41066 | 6.27868  |
| -6.97985 | -2.45465 | 3.69001  | -3.31467 | 0.72511  | -0.22397 | -5.50826 | -5.22279 | 2.37454  |
| -5.81653 | -1.69763 | 3.83019  | 2.84439  | 1.50956  | 1.93578  | -7.94651 | -2.04095 | 3.98843  |
| -2.21501 | -2.56793 | 1.01278  | 2.96757  | -1.44008 | 1.98896  | -5.84409 | -0.68462 | 4.23401  |
| -3.17687 | 0.74643  | 2.19978  | 1.02671  | 3.04071  | 2.61499  | -7.77402 | -4.37229 | 3.03525  |
| -3.33078 | -0.72283 | -0.19013 | -4.62362 | 4.74575  | 4.42175  | -3.39752 | -1.11131 | 5.67519  |
| -3.00633 | 1.58232  | 3.45446  | -2.03003 | 2.26126  | -1.61265 | -3.23171 | 1.32156  | 5.63785  |
| -0.40227 | -3.52261 | -0.34998 | -0.54490 | -1.27666 | -3.13465 | -0.98125 | 0.63157  | 5.92195  |
| -0.12736 | -3.27440 | 2.10521  | -0.37909 | 3.55717  | -0.60998 | 1.26113  | 1.51960  | 6.21927  |
| -6.88908 | -3.74497 | 3.16206  | -2.18526 | 2.63906  | 0.87074  | 1.47177  | -4.21627 | 3.18946  |
| 0.38758  | -3.54327 | 0.79184  | 0.17183  | 3.02278  | -1.84531 | -4.30606 | 5.60560  | 5.02342  |
| -1.74554 | -3.01933 | -0.23644 | 0.15550  | -3.10993 | -1.62806 | -5.57385 | 1.66648  | 2.37355  |
| 3.26469  | -0.71568 | 0.75114  | 0.84279  | 0.62742  | -3.24913 | -6.59894 | 5.53856  | 4.01255  |
| -3.29137 | -0.57989 | 4.72687  | 0.83790  | -0.82857 | -3.20545 | -7.25362 | 3.50813  | 2.66151  |
| 0.79655  | 2.27300  | 3.72511  | 1.82424  | -1.50339 | -2.47784 |          |          |          |
| -1.45002 | -2.84567 | 2.23151  | -1.71829 | 3.02418  | -0.41421 |          |          |          |
| 1.75735  | -3.10006 | 0.71461  | -1.39111 | -0.09300 | -3.11946 |          |          |          |
| 2.14917  | -2.55870 | 1.97874  | 2.70540  | 0.87357  | 3.24769  |          |          |          |
| -3.19422 | 0.75093  | 4.70678  | -0.08001 | 3.48014  | 1.81584  |          |          |          |
| -4.06518 | 2.70013  | 3.53727  | 3.04817  | -1.40871 | -0.45853 |          |          |          |
| -2.05117 | -2.34428 | -1.48531 | 2.31122  | 2.63280  | -0.67365 |          |          |          |
| -0.34284 | 0.67570  | 5.02614  | 0.43652  | 3.72364  | 0.49246  |          |          |          |

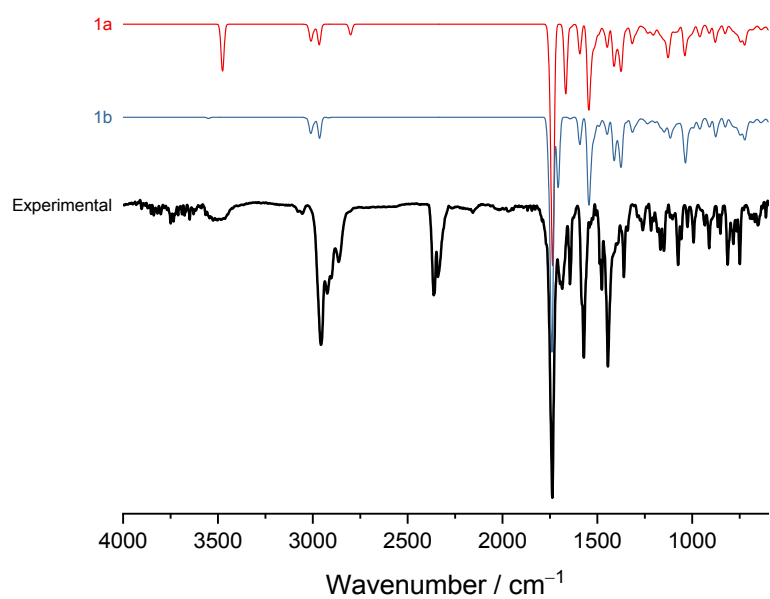

**Figure S5.** Experimental and simulated IR spectra for **1**.

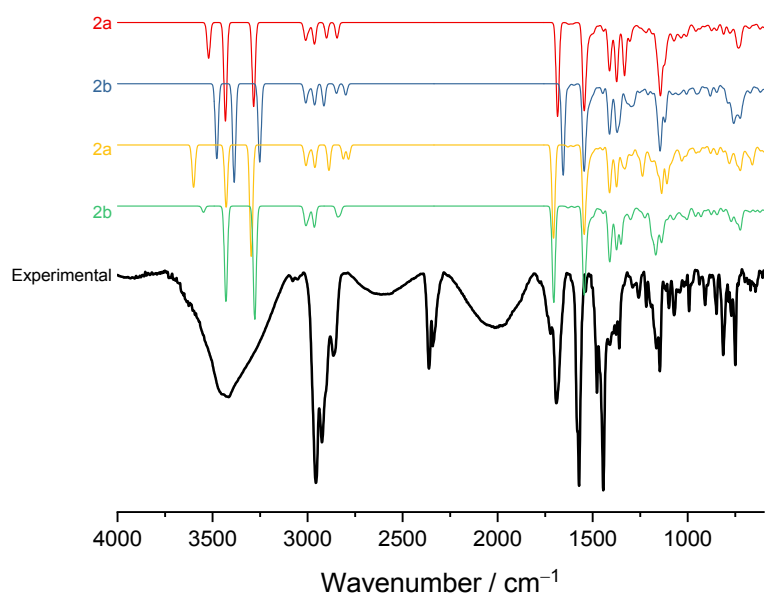

**Figure S6.** Experimental and simulated IR spectra for **2**.

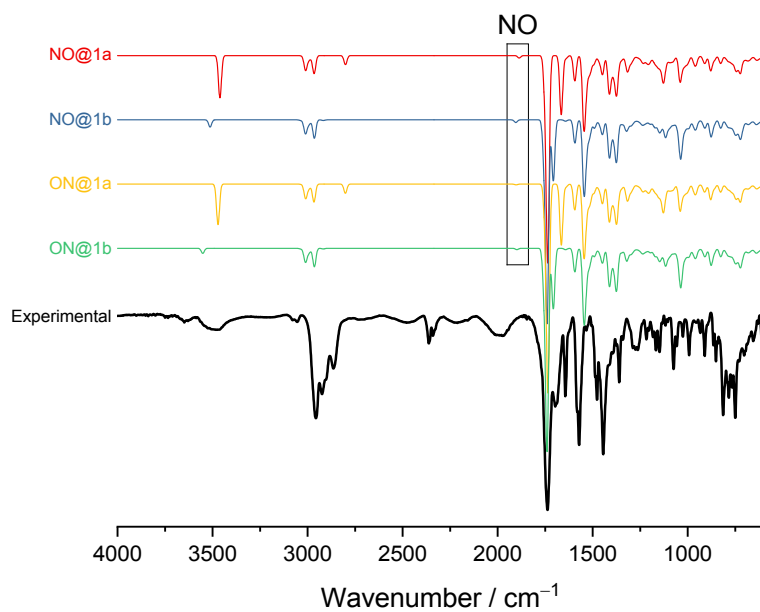

**Figure S7.** Experimental and simulated IR spectra for (NO)@1.

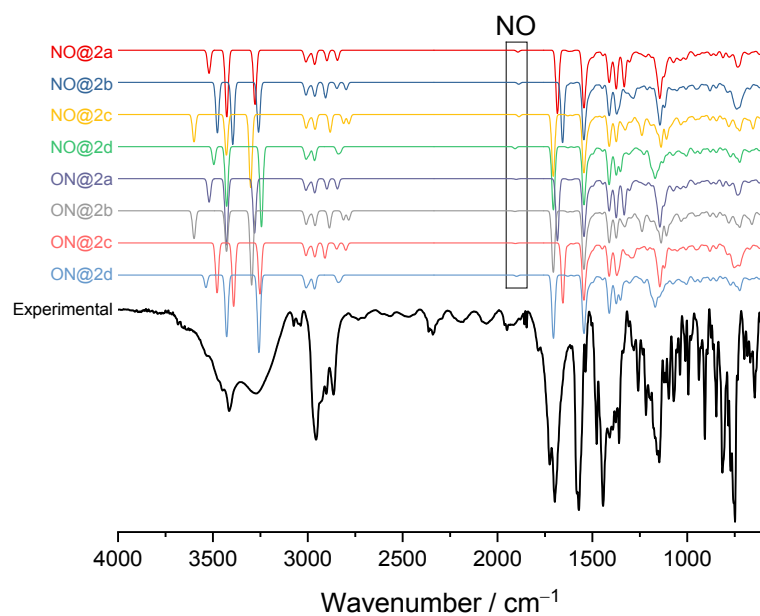

**Figure S8.** Experimental and simulated IR spectra for (NO)@2.

#### 4. References

1. S. Hasegawa, Y. Hashikawa, T. Kato and Y. Murata, *Angew. Chem. Int. Ed.*, 2018, **57**, 12804-12808.
2. Y. Hashikawa, S. Hasegawa and Y. Murata, *Chem. Commun.*, 2018, **54**, 13686-13689.
3. Y. Hashikawa, S. Hasegawa and Y. Murata, *Angew. Chem. Int. Ed.*, 2021, **60**, 2866-2870.
4. N. Frank, *Wiley. Interdiscip. Rev. Comput. Mol. Sci.*, 2012, **2**, 73-78.
5. S. Grimme, S. Ehrlich and L. Goerigk, *J. Comput. Chem.*, 2011, **32**, 1456-1465.
6. S. Grimme, J. Antony, S. Ehrlich and H. Krieg, *J. Chem. Phys.*, 2010, **132**, 154104.
7. C. Lee, W. Yang and R. G. Parr, *Phys. Rev. B*, 1988, **37**, 785-789.
8. A. D. Becke, *J. Chem. Phys.*, 1993, **98**, 5648-5652.
9. F. Weigend and R. Ahlrichs, *Phys. Chem. Chem. Phys.*, 2005, **7**, 3297-3305.
10. F. Weigend, *Phys. Chem. Chem. Phys.*, 2006, **8**, 1057-1065.
11. A. D. Becke, *Phys. Rev. A*, 1988, **38**, 3098-3100.
12. A. Hellweg, C. Hättig, S. Höfener and W. Klopper, *Theor. Chem. Acc.*, 2007, **117**, 587-597.
